# Supplementary material for: Proteolysis of histidine kinase VgrS inhibits its autophosphorylation and promotes osmostress resistance in Xanthomonas campestris
Source: PubMed Central journal article supplement (PMC6237974; doi:10.1038/s41467-018-07228-4), 2018-11-15
Supplement: 41467_2018_7228_MOESM1_ESM.pdf [file 41467_2018_7228_MOESM1_ESM.pdf]

## **Supplementary Information**

Proteolysis of histidine kinase VgrS inhibits its autophosphorylation and promotes osmostress resistance in *Xanthomonas campestris*

Deng et al.

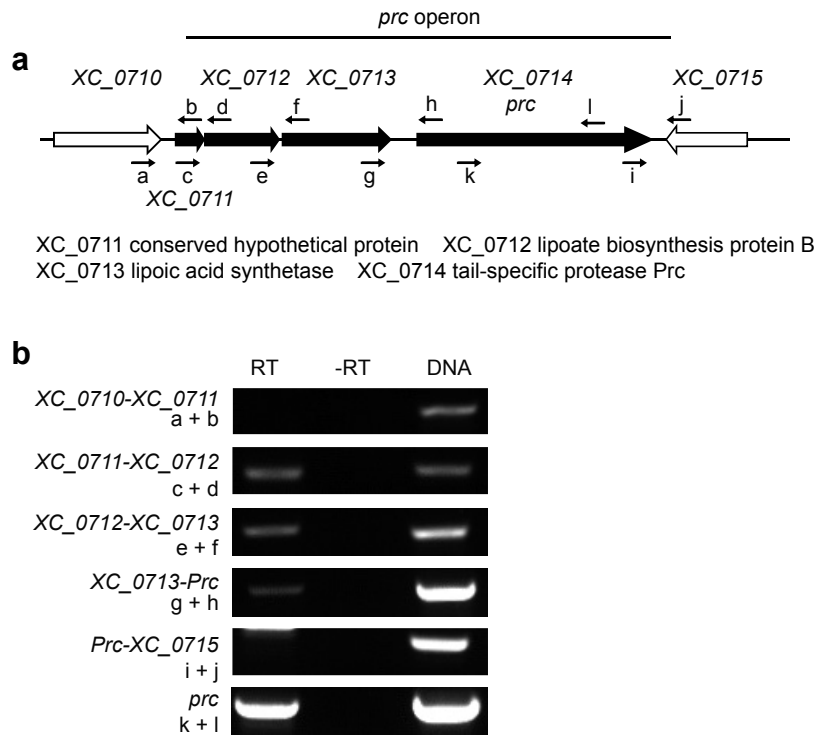

**Supplementary Fig. 1** *prc* is located in an operon containing four genes. **a** Organization of the *prc* operon. Upper panel: location of genes in the genome of *X. campestris* pv. *campestris* 8004. Large arrows indicate genes and their transcriptional directions. Alphabets a to j indicate the location of primers used to amplify the potential intergenic transcripts. Lower panel: protein products of the genes. **b** RT-PCR assay of intergenic regions between XC\_0710 to XC\_0715. Primers were used to amplify the cDNA of intergenic transcripts. Amplification of *prc* cDNA was used as positive control. RT: RT-PCR. -RT: negative control, using cDNA which was synthesized without reverse transcriptase. DNA: bacterial genome DNA using as the positive control. The experiment was repeated three times.

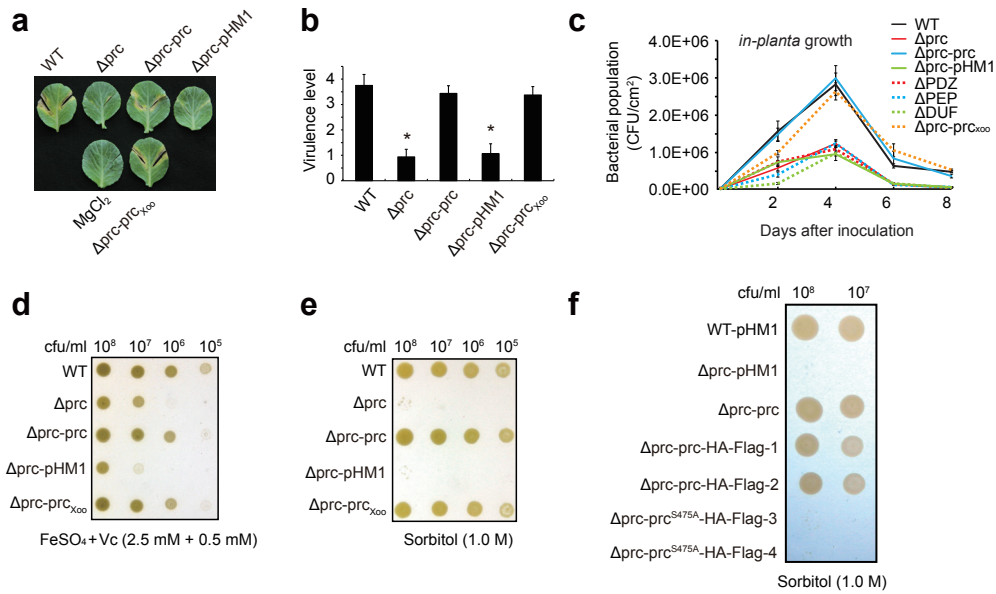

**Supplementary Fig. 2** Prc function is evolutionarily conserved between *X. campestris* pv. *campestris* and *X. oryzae* pv. *oryzae*. **a** and **b** Bacterial virulence against host plant *B. oleracea* cv. Jingfeng No. 1. Virulence scores were estimated 10 d after inoculation. Sterile  $MgCl_2$  (10 mM) was inoculated as a negative control. **a** Lesions in plant leaves. **b** Virulence scores of bacterial strains as shown in **a**. The virulence levels were estimated by a semi-quantitative standard. Genetic complementary by *in trans* providing a *prc* of *X. oryzae* pv. *oryzae* (*prc*<sub>Xoo</sub>) fully restored the phenotypic deficiencies of *prc* deletion mutant of *X. campestris* pv. *campestris*. Asterisk indicates significant difference relative to the WT strain ( $P < 0.05$ ,  $n = 12$ ). **c** *in-planta* growth assay of bacterial strains. Bacterial cells were infiltrated into plant leaves and populations were measured. For each data point,  $n = 6$ . **d** Bacterial resistance to iron stress. Bacterial strains were grown on NYG agar containing 2.5 mM  $FeSO_4$  plus 0.5 mM vitamin C for 72 h under 28°C. **e** Bacterial resistance to osmotic stress. Bacterial strains were grown on NYG agar containing 1.0 M sorbitol for 72 h under 28°C. cfu: colony-forming unit. In **c** and **d**, each experiment was repeated three times. **f** C-terminal tags did not affect bacterial resistance to sorbitol stress. The growth of recombinant strains of  $\Delta prc$ -prc-HA-Flag or  $\Delta prc$ -prc<sup>S475A</sup>-HA-Flag was compared with WT,  $\Delta prc$ , and  $\Delta prc$ -prc. Strains were grown on NYG agar containing 1.0 M sorbitol for 72 h under 28°C. **d-f**, each experiment was repeated for three times.

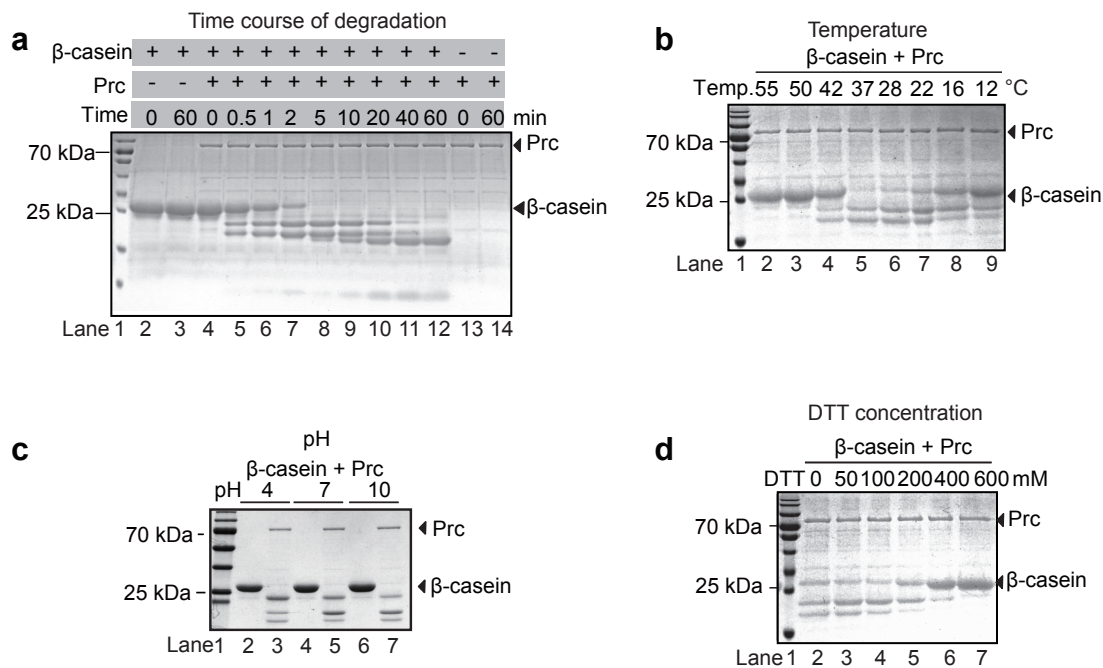

**Supplementary Fig. 3** Impact of environmental factors on Prc activity. **a** Time course of Prc activity in degrading  $\beta$ -casein. **b** Impact of different temperature on the Prc activity. **c** Impact of different pH value on the Prc activity. **d** Impact of different DTT concentrations on the Prc activity. In these experiments,  $\beta$ -casein (40  $\mu$ M) and Prc (1  $\mu$ M) proteins were co-incubated. The reactions were stopped and analyzed by SDS-PAGE with Coomassie brilliant blue staining. Each experiment was repeated three times.

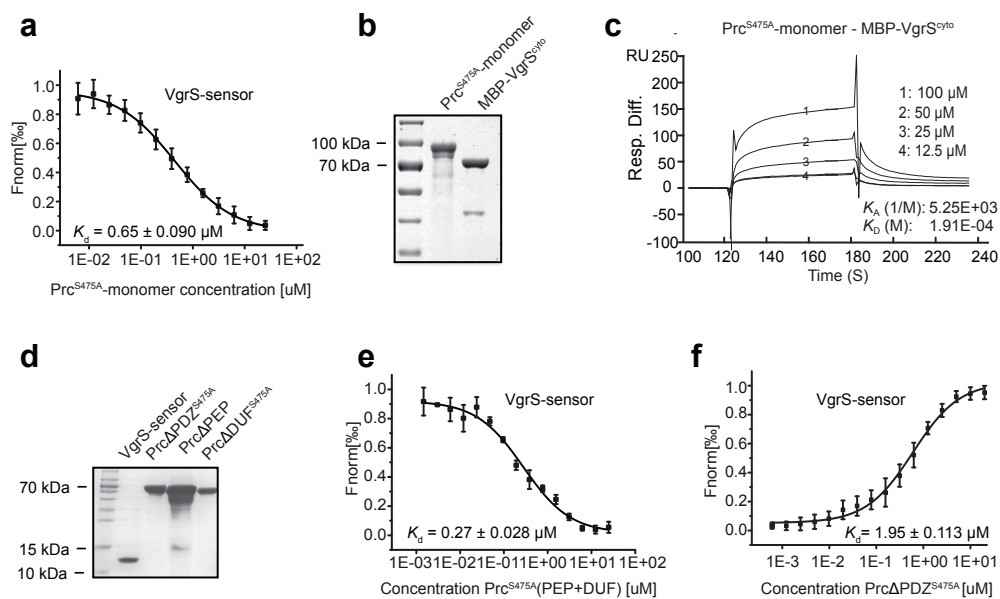

**Supplementary Fig. 4** Identification of Prc region which binds VgrS sensor. **a** Microscale thermophoresis (MST) analysis revealed that VgrS sensor binds Prc monomer. VgrS sensor was labelled and the titrations of Prc<sup>S475A</sup> monomer ranged from 0.006 to 25  $\mu\text{M}$ . The solid curve is the fit of the data points to the standard KD-Fit function. Black bars represent standard deviations.  $K_d$ , dissociation constant. The experiment was repeated three times. **b** Purification of Prc monomer and cytosolic region of VgrS (MBP-VgrS<sup>cyto</sup>). The proteins were separated by SDS-PAGE before staining with Coomassie brilliant blue. **c** Cytosolic region of VgrS did not bind Prc monomer. Surface plasmon resonance (SPR) was used to estimate kinetics of protein interactions. MBP-VgrS<sup>cyto</sup> protein was trapped on a sensor CM5 chip and various concentrations of Prc were injected at a flow-rate of 30  $\mu\text{l}/\text{min}$  at 25°C. Data were analyzed using a model for a single set of identical binding sites. Binding kinetics of Prc-VgrS sensor interaction.  $K_A$ : equilibrium association rate constant.  $K_D$ : equilibrium dissociation rate constant. **d** Purification of truncated Prc<sup>S475A</sup> proteins. Prc<sup>S475A</sup> protein without peptidase, PDZ and DUF domains, respectively, was purified. The proteins were separated by SDS-PAGE before staining with Coomassie brilliant blue. **e** and **f** MST analyses revealed that VgrS sensor binds Prc<sup>S475A</sup> proteins with peptidase and DUF domains. **e** Binding affinity between VgrS sensor and Prc<sup>S475A</sup>(PEP + DUF). **f** Binding affinity between VgrS sensor and Prc $\Delta$ PDZ<sup>S475A</sup>. The condition of MST assays is similar to that described in **a**. Each experiment was repeated three times.

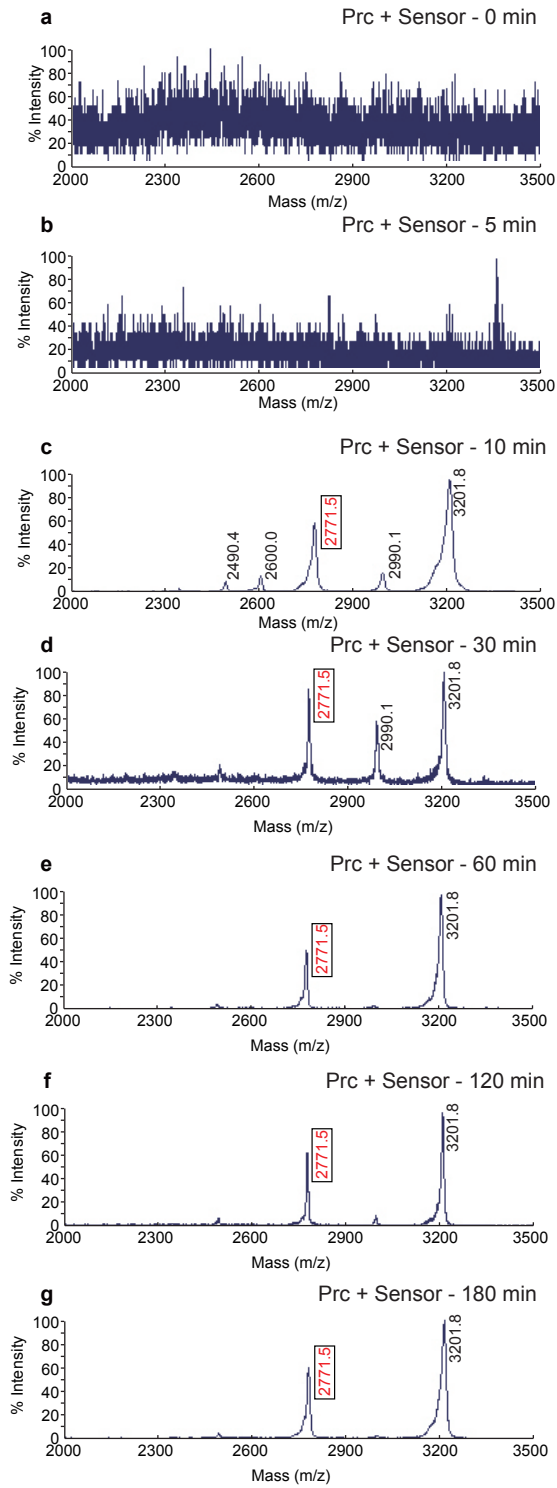

**Supplementary Fig. 5** The MALDI-TOF-MS spectra analysis. **a-g** VgrS sensor was digested by Prc with indicated time and detected on AB Sciex 5800 MALDI-TOF TOF mass spectrometer in the positive ion mode over the  $m/z$  range from 2000 to 3500. Spectra showed the relative intensities with a zoom on the mass range.

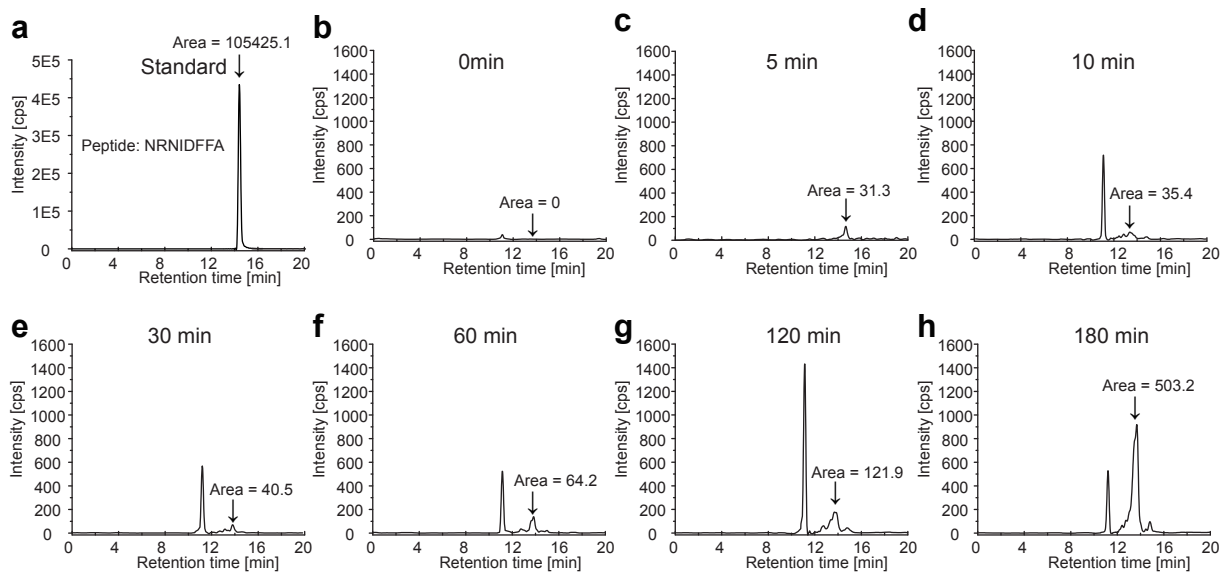

**Supplementary Fig. 6** Accumulation of the cleaved, N-terminal peptide (2nd-9th aa.) of VgrS triggered by Prc proteolysis. **a** QTRAP LC-MS/MS analysis of chemically synthesized peptide (2nd-9th aa., NRNIDFFA) standard. **b-h** Identification and quantification of relative content of the proteolytic peptides at different reaction time. Full-length VgrS embedded in the inverted membrane vesicles was mixed with Prc and co-incubated at the indicating time, equivalent volume of the mixer was collected and subjected to liquid nitrogen for fixing the proteolytic status. After filtration with 3K Ultrafiltration devices, the peptides below 3 kDa were concentrated and then used for QTRAP LC-MS/MS analysis. The relative levels of the peptide were determined with Analyte Peak Area (counts).

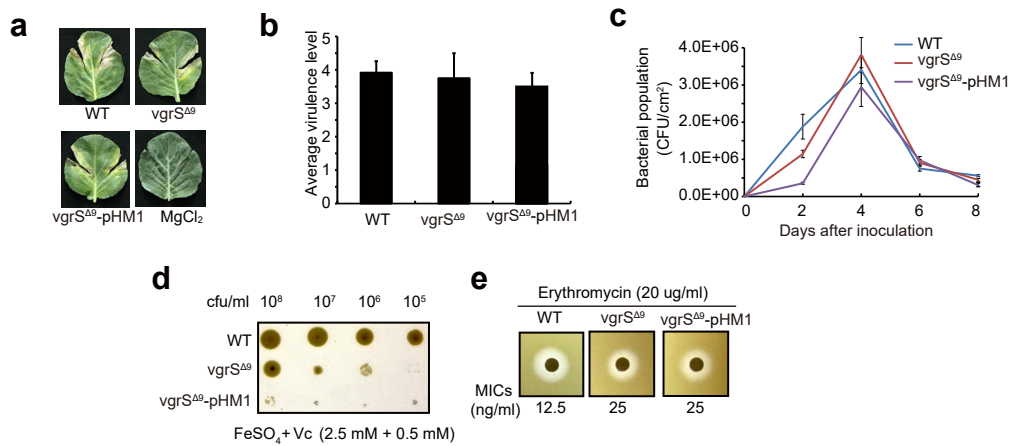

**Supplementary Fig. 7** Phenotypic characterization of mutant strain *vgrS*<sup>Δ9</sup>. *vgrS*<sup>Δ9</sup> was constructed by amino acids deletion in the N-terminus of *vgrS*. **a** The virulence assay of *vgrS*<sup>Δ9</sup>. Bacterial strains were inoculated onto the leaves of *B. oleraceae* cv. Jingfeng No. 1. Virulence scores were estimated 10 d after inoculation. Sterile 10 mM MgCl<sub>2</sub> was inoculated as a negative control. **b** Virulence scores of bacterial strains. The virulence levels of bacterial strains were estimated using a semi-quantitative standard. Asterisks indicate significant differences compared with the WT strain (Student *t*-test, *P* < 0.05, *n* = 12). **c** *in-planta* growth assay of bacterial strains. For each data point, *n* = 6. **d** The sensitivity of iron stress of *vgrS*<sup>Δ9</sup>. Bacterial strains were grown on NYG agar containing 2.5 mM FeSO<sub>4</sub> plus 0.5 mM vitamin C for 72 h at 28°C. **e** The sensitivity of erythromycin of *vgrS*<sup>Δ9</sup>. The inhibitory zones of antibiotics are shown, and the minimal inhibitory concentrations (MICs) of antibiotics were measured and are listed below. In **d** and **e**, the experiments were repeated three times.



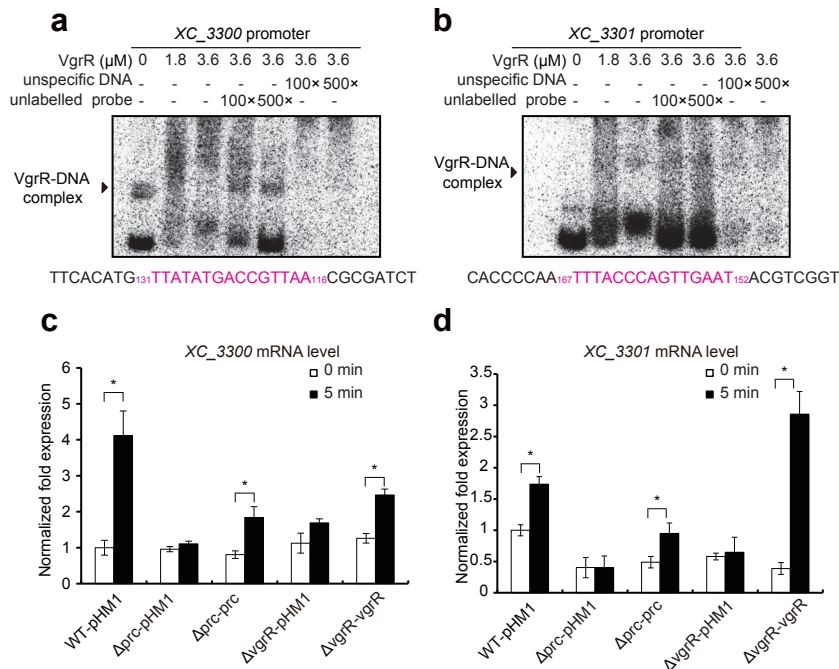

**Supplementary Fig. 8** *prc* positively modulates the VgrR regulon. **a** and **b** EMSA revealed that VgrR directly bound the promoter region of *XC\_3300* and *XC\_3301*. PCR products of the promoter regions were labelled with [ $\gamma$ - $^{32}$ P]ATP and used as DNA probes. Unlabelled DNA and non-specific DNA were used as competitors. The sequence of DNA probe was shown below with VgrR-binding motif in magenta. Numbers indicate the location relative to the translation initiation site. Each experiment was repeated two times. Triangles indicate VgrR-DNA complexes. **c** and **d** The *prc* mutation caused decrease in the transcription level of *XC\_3300* and *XC\_3301* when bacterial strains were grown under osmostress. qRT-PCR was used to quantify the mRNA amounts of these genes under different bacterial background before and after osmostress stimulation (1.0 M sorbitol, 5 min). The expression of tmRNA was used as an internal control. A representative of three independent experiments is shown. In **c** and **d**, Error bars indicate the standard deviations. Asterisks indicate significant differences of strains before and after osmostress (Student's *t*-test,  $P < 0.05$ ).

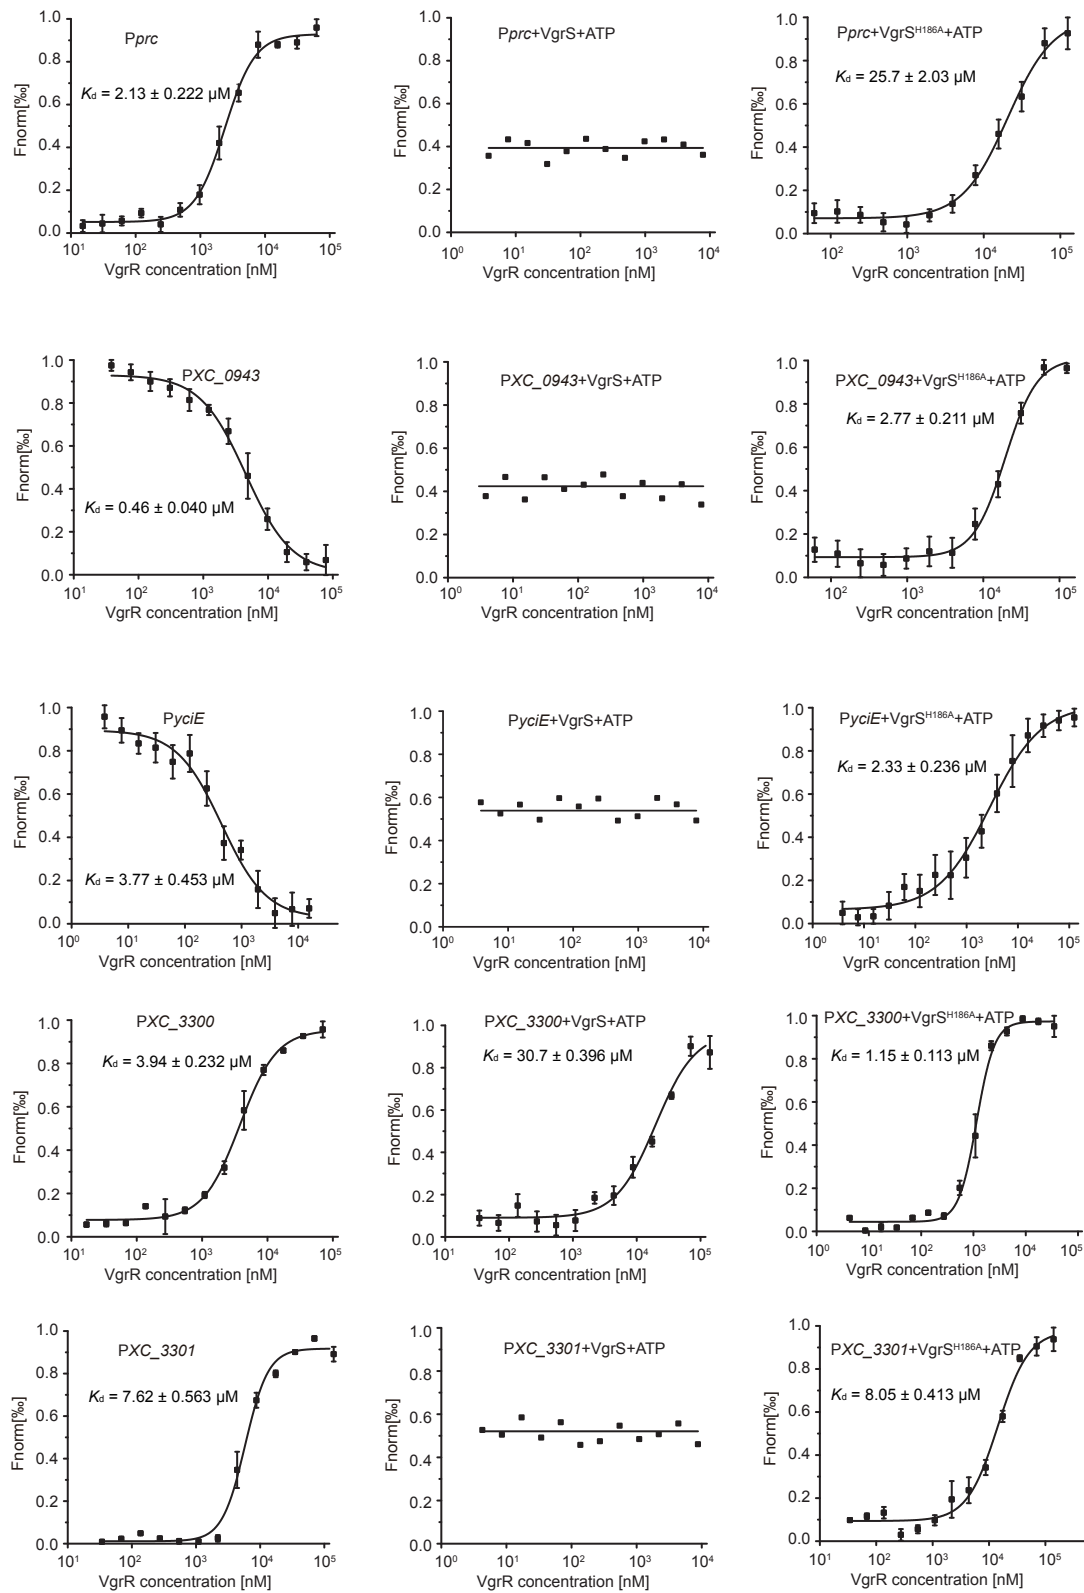

**Supplementary Fig. 9** Phosphorylation of VgrR decreases the VgrR–DNA binding affinity. **a–e** Double-stranded DNA probes were labelled by 5'-FAM and microscale thermophoresis was used to measure the VgrR–DNA binding affinity. Binding affinities between the VgrR and promoter regions of *prc*, *XC\_0943*, *XC\_2164*, *XC\_3300* and *XC\_3301*, respectively. Left panels: Binding affinity of the unphosphorylated VgrR and DNA probes. Middle panels: Binding affinity of the phosphorylated VgrR and DNA probes. VgrR was phosphorylated by VgrS in the presence of ATP, and could not be phosphorylated by VgrS<sup>H186A</sup>. Right panels: Negative controls. Each experiment was repeated three times.  $K_d$ , dissociation constant.

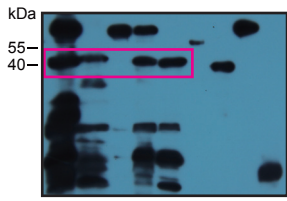

Fig 1b  $\alpha$ -VgrS

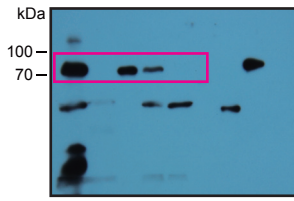

Fig 1b  $\alpha$ -Prc

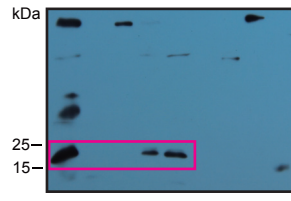

Fig 1b  $\alpha$ -HppK

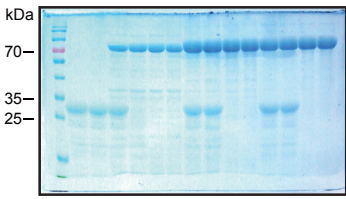

Fig 2

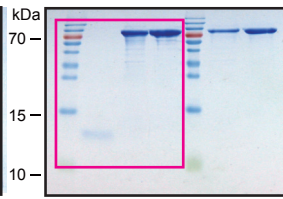

Fig 3c CBB

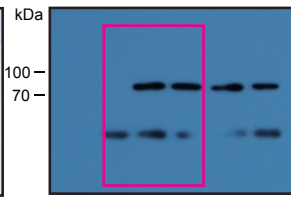

Fig 3c  $\alpha$ -Prc

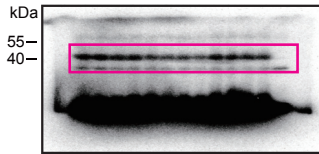

Fig 4a Autokinase assay

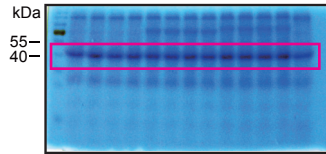

Fig 4a CBB

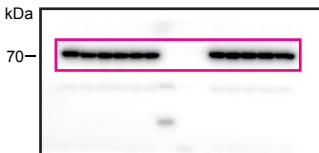

Fig 4b Autokinase assay

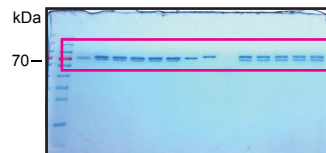

Fig 4b CBB

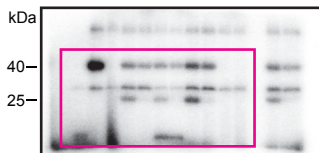

Fig 4c Autokinase assay

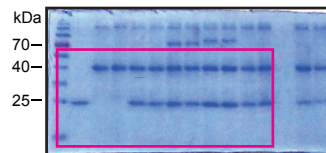

Fig 4c CBB

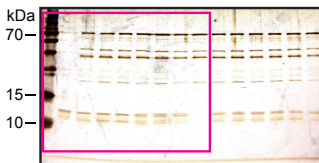

Fig 4d Silver staining

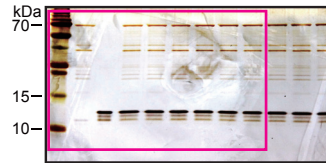

Fig 4e Silver staining

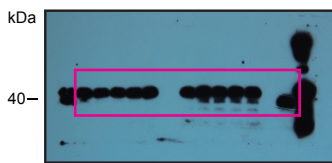

Fig 4f  $\alpha$ -VgrS

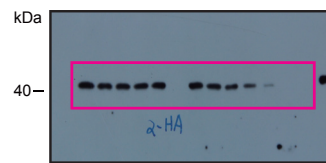

Fig 4f  $\alpha$ -HA

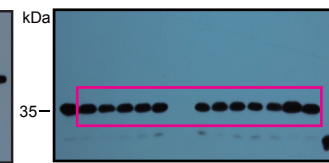

Fig 4f  $\alpha$ -RNAP

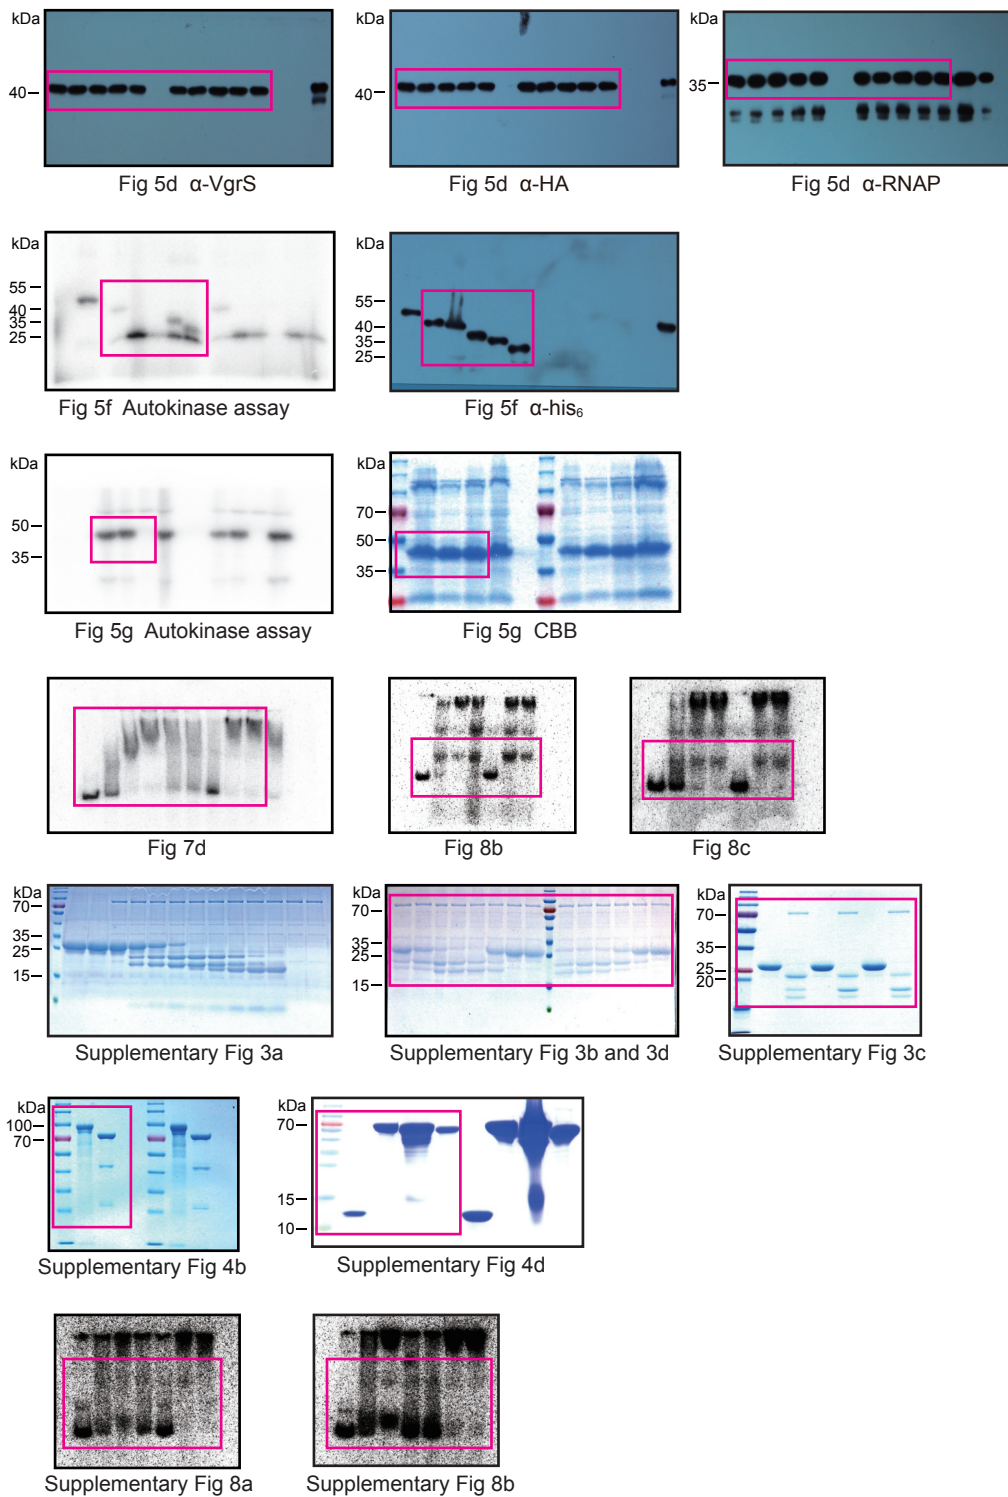

**Supplementary Fig. 10** Full images of the Western blots and protein gels used in the study. The magenta frames indicate the cropped parts. CBB: Coomassie bright blue staining. These images include results of Western blotting, in vitro phosphorylation assay, EMSA and CBB staining of the proteins.

**Supplementary Table 1.** Bacterial strains and plasmids used in this study

| Names                                                       | Genotype or relevant properties                                                                                                                                                        | Source                        |
|-------------------------------------------------------------|----------------------------------------------------------------------------------------------------------------------------------------------------------------------------------------|-------------------------------|
| <b>Bacterial Strains</b>                                    |                                                                                                                                                                                        |                               |
| <i>Escherichia coli</i> strains                             |                                                                                                                                                                                        |                               |
| <i>E. coli</i> DH5α                                         | <i>fhuA2</i> Δ( <i>argF-lacZ</i> )U169 <i>phoA glnV44</i> Φ80<br>Δ( <i>lacZ</i> )M15 <i>gyrA96 recA1 relA1 endA1 thi-1 hsdR17</i>                                                      | Lab collection                |
| <i>E. coli</i> BL21(DE3)                                    | <i>E. coli</i> B F <sup>-</sup> <i>dcm ompT hsd(r<sub>B</sub>- m<sub>B</sub>-)</i> <i>gal λ(DE3)</i>                                                                                   | Lab collection                |
| <i>Xanthomonas campestris</i> pv. <i>campestris</i> strains |                                                                                                                                                                                        |                               |
| WT                                                          | <i>Xcc</i> 8004 wild type strain (WT), Rif <sup>r</sup>                                                                                                                                | Lab collection                |
| WT-pHM1                                                     | WT containing a blank pHM1 vector, Rif <sup>r</sup> , Sp <sup>r</sup>                                                                                                                  | Lab collection                |
| M0120                                                       | Δ <i>vgrR</i> , marker-exchange mutant of <i>XC_1049(vgrR)</i> , replacement <i>vgrR</i> with a tetracycline resistance genes, Rif <sup>r</sup> , Tc <sup>r</sup>                      | Wang et al, 2016 <sup>1</sup> |
| M0121                                                       | Δ <i>vgrR</i> -pHM1, Δ <i>vgrR</i> containing a pHM1 vector, Rif <sup>r</sup> , Sp <sup>r</sup>                                                                                        | Wang et al, 2016 <sup>1</sup> |
| M0122                                                       | Δ <i>vgrS</i> , <i>XC_1050 (vgrS)</i> in-frame deletion mutant, Rif <sup>r</sup>                                                                                                       | Wang et al, 2016 <sup>1</sup> |
| M0123                                                       | Δ <i>vgrS</i> -pHM1, Δ <i>vgrS</i> containing a blank pHM1 vector, Rif <sup>r</sup> , Sp <sup>r</sup>                                                                                  | Wang et al, 2016 <sup>1</sup> |
| M0124                                                       | Δ <i>vgrR</i> - <i>vgrR</i> , genetic complementary strain. Δ <i>vgrR</i> containing a pHM1:: <i>vgrR</i> vector, Rif <sup>r</sup> , Sp <sup>r</sup>                                   | Wang et al, 2016 <sup>1</sup> |
| M0125                                                       | Δ <i>vgrS</i> - <i>vgrS</i> , genetic complementary strain. Δ <i>vgrS</i> containing a pHM1:: <i>vgrS</i> vector, Rif <sup>r</sup> , Sp <sup>r</sup>                                   | Wang et al, 2016 <sup>1</sup> |
| M0134                                                       | WT- <i>vgrR</i> -his <sub>6</sub> , WT containing a pHM1:: <i>vgrR</i> vector with the C terminal of VgrR addition of hexa-histidine tag, Rif <sup>r</sup>                             | Wang et al, 2016 <sup>1</sup> |
| M0136                                                       | Δ <i>vgrR</i> - <i>vgrR</i> <sup>D51A</sup> , genetic complementary strain. Δ <i>vgrR</i> containing a pHM1:: <i>vgrR</i> <sup>D51A</sup> vector, Rif <sup>r</sup> , Sp <sup>r</sup>   | Wang et al, 2016 <sup>1</sup> |
| M0137                                                       | Δ <i>vgrS</i> - <i>vgrS</i> <sup>H186A</sup> , genetic complementary strain. Δ <i>vgrS</i> containing a pHM1:: <i>vgrS</i> <sup>H186A</sup> vector, Rif <sup>r</sup> , Sp <sup>r</sup> | Wang et al, 2016 <sup>1</sup> |
| M0190                                                       | Δ <i>prc</i> , <i>XC_0714(prc)</i> in-frame deletion mutant, Rif <sup>r</sup>                                                                                                          | This study                    |
| M0191                                                       | ΔPEP, in-frame deletion mutant of PEP domain, Rif <sup>r</sup>                                                                                                                         | This study                    |
| M0192                                                       | ΔPDZ, in-frame deletion mutant of PDZ domain, Rif <sup>r</sup>                                                                                                                         | This study                    |
| M0193                                                       | ΔDUF, in-frame deletion mutant of DUF domain, Rif <sup>r</sup>                                                                                                                         | This study                    |
| M0194                                                       | Δ <i>prc</i> - <i>prc</i> , genetic complementary strain. Δ <i>prc</i> containing a pHM1:: <i>prc</i> vector, Rif <sup>r</sup> , Sp <sup>r</sup>                                       | This study                    |
| M0195                                                       | Δ <i>prc</i> -pHM1, Δ <i>prc</i> containing a blank pHM1 vector, Rif <sup>r</sup> , Sp <sup>r</sup>                                                                                    | This study                    |

|       |                                                                                                                                                                                                                                                                                                                                        |            |
|-------|----------------------------------------------------------------------------------------------------------------------------------------------------------------------------------------------------------------------------------------------------------------------------------------------------------------------------------------|------------|
| M0196 | $\Delta$ prc-prc <sub>Xoo</sub> , heterogenetic complementary strain. $\Delta$ prc containing a pHM1::prc <sub>Xoo</sub> vector, Rif <sup>r</sup> , Sp <sup>r</sup>                                                                                                                                                                    | This study |
| M0197 | $\Delta$ prc-prc-HA-FLAG, strain for tandem affinity Co-IP. $\Delta$ prc containing a pHM1::prc-HA-Flag, Rif <sup>r</sup> , Sp <sup>r</sup>                                                                                                                                                                                            | This study |
| M0198 | $\Delta$ prc-prc <sup>S475A</sup> -HA-FLAG, strain for tandem affinity Co-IP. $\Delta$ prc containing a pHM1::prc-HA-Flag with a S475A mutation, Rif <sup>r</sup> , Sp <sup>r</sup>                                                                                                                                                    | This study |
| M0199 | $\Delta$ vgrS-vgrS <sup>A9G-Q10A</sup> , genetic complementary strain. $\Delta$ vgrS containing a pHM1::vgrS <sup>A9G-Q10A</sup> vector, Rif <sup>r</sup> , Sp <sup>r</sup>                                                                                                                                                            | This study |
| M0200 | vgrS <sup><math>\Delta</math>9</sup> , XC_1050 (vgrS) with 2 <sup>nd</sup> to 9 <sup>th</sup> aa. being deleted, Rif <sup>r</sup>                                                                                                                                                                                                      | This study |
| M0201 | vgrS <sup><math>\Delta</math>9</sup> -pHM1, $\Delta$ vgrS <sup><math>\Delta</math>9</sup> containing a blank pHM1 vector, Rif <sup>r</sup> , Sp <sup>r</sup>                                                                                                                                                                           | This study |
| M0202 | $\Delta$ prc-vgrS <sup><math>\Delta</math>9</sup> , prc and vgrS <sup><math>\Delta</math>9</sup> double in-frame deletion mutant, Rif <sup>r</sup>                                                                                                                                                                                     | This study |
| M0203 | $\Delta$ prc $\Delta$ vgrS, prc and vgrS double in-frame deletion mutant, Rif <sup>r</sup>                                                                                                                                                                                                                                             | This study |
| M0204 | $\Delta$ prc $\Delta$ vgrS-prc, $\Delta$ prc $\Delta$ vgrS containing a pHM1::prc vector, for epistatic analysis, Rif <sup>r</sup> , Sp <sup>r</sup>                                                                                                                                                                                   | This study |
| M0205 | $\Delta$ prc $\Delta$ vgrS-vgrS, $\Delta$ prc $\Delta$ vgrS containing a pHM1::vgrS vector, for epistatic analysis, Rif <sup>r</sup> , Sp <sup>r</sup>                                                                                                                                                                                 | This study |
| M0206 | $\Delta$ prc $\Delta$ vgrS-pHM1, $\Delta$ prc $\Delta$ vgrS containing a pHM1 vector, for epistatic analysis, Rif <sup>r</sup> , Sp <sup>r</sup>                                                                                                                                                                                       | This study |
| M0207 | $\Delta$ vgrS-3HA-vgrS, $\Delta$ vgrS containing a pHM1::3HA-vgrS <sup><math>\Delta</math>4</sup> . Coding sequence of the HA tag was inserted into the site between 3 <sup>rd</sup> and 4 <sup>th</sup> amino acid of VgrS, for detection the amount of VgrS protein <i>in vivo</i> , Rif <sup>r</sup> , Sp <sup>r</sup>              | This study |
| M0208 | $\Delta$ vgrS-vgrS <sup>HA-A9G-Q10A</sup> , $\Delta$ vgrS containing a pHM1::vgrS <sup>HA-A9G-Q10A</sup> with N terminal the third amino acid of VgrS insertion of a HA tag and with A9G, Q10A double mutation, for detection the amount of VgrS protein <i>in vivo</i> , Rif <sup>r</sup> , Sp <sup>r</sup>                           | This study |
| M0209 | $\Delta$ prc $\Delta$ vgrS-vgrS <sup>HA</sup> , $\Delta$ prc $\Delta$ vgrS containing a pHM1::vgrS <sup>HA</sup> with N terminal the third amino acid of VgrS insertion of a HA tag, for detection the amount of VgrS protein <i>in vivo</i> , Rif <sup>r</sup> , Sp <sup>r</sup>                                                      | This study |
| M0210 | $\Delta$ prc $\Delta$ vgrS-vgrS <sup>HA-A9G-Q10A</sup> , $\Delta$ prc $\Delta$ vgrS containing a pHM1::vgrS <sup>HA-A9G-Q10A</sup> with N terminal the third amino acid of VgrS insertion of a HA tag and with A9G, Q10A double mutation, for detection the amount of VgrS protein <i>in vivo</i> , Rif <sup>r</sup> , Sp <sup>r</sup> | This study |
| M0211 | $\Delta$ prc $\Delta$ vgrR, prc and vgrR double in-frame deletion mutant, Rif <sup>r</sup>                                                                                                                                                                                                                                             | This study |
| M0212 | $\Delta$ prc $\Delta$ vgrR-prc, $\Delta$ prc $\Delta$ vgrR containing a pHM1::prc vector, for epistatic analysis, Rif <sup>r</sup> , Sp <sup>r</sup>                                                                                                                                                                                   | This study |
| M0213 | $\Delta$ prc $\Delta$ vgrR-vgrR, $\Delta$ prc $\Delta$ vgrR containing a pHM1::vgrR vector, for epistatic analysis, Rif <sup>r</sup> , Sp <sup>r</sup>                                                                                                                                                                                 | This study |
| M0214 | $\Delta$ prc $\Delta$ vgrR-pHM1, $\Delta$ prc $\Delta$ vgrR containing a pHM1 vector, for epistatic analysis, Rif <sup>r</sup> , Sp <sup>r</sup>                                                                                                                                                                                       | This study |
| M0215 | $\Delta$ prc $\Delta$ vgrR-vgrR <sup>D51A</sup> , $\Delta$ prc $\Delta$ vgrR containing a pHM1::vgrR <sup>D51A</sup> vector, for epistatic analysis, Rif <sup>r</sup> , Sp <sup>r</sup>                                                                                                                                                | This study |

|       |                                                                                                                                                                                                                                                                                                                                                      |            |
|-------|------------------------------------------------------------------------------------------------------------------------------------------------------------------------------------------------------------------------------------------------------------------------------------------------------------------------------------------------------|------------|
| M0216 | $\Delta$ prc-vgrR-his <sub>6</sub> , $\Delta$ prc containing a pHM1::vgrR vector with the C terminal of VgrR addition of hexa-histidine tag, Rif <sup>r</sup>                                                                                                                                                                                        | This study |
| M0217 | $\Delta$ vgrS-3×Flag-vgrS, $\Delta$ vgrS containing a pHM1::3×Flag-vgrS. Coding sequence of the 3×Flag tag was inserted into the site between 1 <sup>st</sup> and 2 <sup>nd</sup> amino acid of VgrS, for detection the amount of VgrS protein <i>in vivo</i> , Rif <sup>r</sup> , Sp <sup>r</sup>                                                   | This study |
| M0218 | $\Delta$ prc $\Delta$ vgrS-vgrS <sup>3×Flag</sup> , $\Delta$ prc $\Delta$ vgrS containing a pHM1::vgrS <sup>3×Flag</sup> . Coding sequence of the 3×Flag tag was inserted into the site between 1 <sup>st</sup> and 2 <sup>nd</sup> amino acid of VgrS, for detection the amount of VgrS protein <i>in vivo</i> , Rif <sup>r</sup> , Sp <sup>r</sup> | This study |
| M0219 | $\Delta$ 0943, <i>XC_0943</i> in-frame deletion mutant, Rif <sup>r</sup>                                                                                                                                                                                                                                                                             | This study |
| M0220 | $\Delta$ 2164, <i>XC_2164</i> in-frame deletion mutant, Rif <sup>r</sup>                                                                                                                                                                                                                                                                             | This study |
| M0221 | $\Delta$ 0690, <i>XC_0690</i> in-frame deletion mutant, Rif <sup>r</sup>                                                                                                                                                                                                                                                                             | This study |
| M0222 | $\Delta$ 3300, <i>XC_3300</i> in-frame deletion mutant, Rif <sup>r</sup>                                                                                                                                                                                                                                                                             | This study |
| M0223 | $\Delta$ 3301, <i>XC_3301</i> in-frame deletion mutant, Rif <sup>r</sup>                                                                                                                                                                                                                                                                             | This study |
| M0224 | $\Delta$ 3576, <i>XC_3576</i> in-frame deletion mutant, Rif <sup>r</sup>                                                                                                                                                                                                                                                                             | This study |

#### Plasmids

|                                             |                                                                                                                                                  |                |
|---------------------------------------------|--------------------------------------------------------------------------------------------------------------------------------------------------|----------------|
| pK18mobsacB                                 | <i>sacB</i> , <i>lacZ<math>\alpha</math></i> , Km <sup>r</sup> /mobilizable <i>E. coli</i> suicide vector, allows selection for double-crossover | Lab collection |
| pHM1                                        | Broad host range vector with pUC19 polylinker, used as the complementary vector, Sp <sup>r</sup>                                                 | Lab collection |
| pET30a (+)                                  | Protein expression vector, Kan <sup>r</sup>                                                                                                      | Novagen        |
| pET30a-Prc                                  | pET30a::Prc, expressing full length Prc <sub>Xcc</sub> , Kan <sup>r</sup>                                                                        | This study     |
| pET30a-Prc <sup>S475A</sup>                 | pET30a::Prc <sup>S475A</sup> , expressing full length Prc <sub>Xcc</sub> with active site mutation S475A, Kan <sup>r</sup>                       | This study     |
| pET30a-Prc <sup>K500A</sup>                 | pET30a::Prc <sup>K500A</sup> , expressing full length Prc <sub>Xcc</sub> with active site mutation K500A, Kan <sup>r</sup>                       | This study     |
| pET30a-PDZ                                  | pET30a::PDZ, expressing PDZ domain of Prc <sub>Xcc</sub> , Kan <sup>r</sup>                                                                      | This study     |
| pET30a-PEP                                  | pET30a::PEP, expressing PEP domain of Prc <sub>Xcc</sub> , Kan <sup>r</sup>                                                                      | This study     |
| pET30a-PEP <sup>S475A</sup>                 | pET30a::PEP <sup>S475A</sup> , expressing PEP domain of Prc <sub>Xcc</sub> with active site mutation S475A, Kan <sup>r</sup>                     | This study     |
| pET30a-DUF                                  | pET30a::DUF, expressing DUF domain of Prc <sub>Xcc</sub> , Kan <sup>r</sup>                                                                      | This study     |
| pET30a-PDZ+PEP $\Delta$ 20                  | pET30a::PDZ+PEP, expressing PDZ and PEP domain of Prc <sub>Xcc</sub> , Kan <sup>r</sup>                                                          | This study     |
| pET30a-PDZ+PEP $\Delta$ 20 <sup>S475A</sup> | pET30a::PDZ+PEP <sup>S475A</sup> , expressing PDZ and PEP domain of Prc <sub>Xcc</sub> with active site mutation S475A,                          | This study     |

---

|                                        | Kan <sup>r</sup>                                                                                                                                    |                |
|----------------------------------------|-----------------------------------------------------------------------------------------------------------------------------------------------------|----------------|
| pET30a-PrcΔPDZ                         | pET30a::Prc, expressing full length Prc <sub>Xcc</sub> with PDZ domain deletion, Kan <sup>r</sup>                                                   | This study     |
| pET30a-PrcΔPDZ <sup>S475A</sup>        | pET30a:: Prc <sup>S475A</sup> , expressing full length Prc <sub>Xcc</sub> with PDZ domain deletion and active site mutation S475A, Kan <sup>r</sup> | This study     |
| pET30a-PrcΔPEP                         | pET30a:: Prc, expressing full length Prc <sub>Xcc</sub> with PEP domain deletion, Kan <sup>r</sup>                                                  | This study     |
| pET30a-PrcΔDUF                         | pET30a:: Prc, expressing full length Prc <sub>Xcc</sub> with DUF domain deletion, Kan <sup>r</sup>                                                  | This study     |
| pET30a-PrcΔDUF <sup>S475A</sup>        | pET30a:: Prc <sup>S475A</sup> , expressing full length Prc <sub>Xcc</sub> with DUF domain deletion and active site mutation S475A, Kan <sup>r</sup> | This study     |
| pET30a-VgrS                            | pET30a::VgrS, expressing full length of VgrS, Kan <sup>r</sup>                                                                                      | Lab collection |
| pET30a-VgrS <sup>H186A</sup>           | pET30a::VgrS, expressing full length of VgrS with active site substitution H186A, Kan <sup>r</sup>                                                  | Lab collection |
| pET30a-VgrS <sup>A9G-Q10A</sup>        | pET30a::VgrS, expressing full length of VgrS with double substitutions of A9G and Q10A, Kan <sup>r</sup>                                            | This study     |
| pET30a-3R-VgrS                         | pET30a:: 3R-VgrS, expressing full length of VgrS with three arginines were inserted into the N-terminal, Kan <sup>r</sup>                           | This study     |
| pET30a-4R-VgrS                         | pET30a:: 4R-VgrS, expressing full length of VgrS with four arginines were inserted into the N terminal, Kan <sup>r</sup>                            | This study     |
| pET30a-3×Flag-VgrS                     | pET30a:: 3×Flag-VgrS, expressing full length of VgrS with 3×Flag tag was inserted into the N-terminal, Kan <sup>r</sup>                             | This study     |
| pET30a-VgrS-sensor                     | pET30a::sensor, expressing sensor region of VgrS, Kan <sup>r</sup>                                                                                  | Lab collection |
| pET30a-VgrS-sensor <sup>A9G-Q10A</sup> | pET30a::sensor <sup>A9G-Q10A</sup> , expressing sensor region of VgrS with double substitutions of A9G and Q10A, Kan <sup>r</sup>                   | This study     |
| pET30a-VgrS-3×Flag-sensor              | pET30a:: 3×Flag-sensor, expressing sensor region of VgrS with 3×Flag tag was inserted into the N-terminal , Kan <sup>r</sup>                        | This study     |
| pMBP-VgrS <sub>cyto</sub>              | pMal-p2X::VgrS <sub>cyto</sub> , expressing cytoplasmic portion of VgrS, Amp <sup>r</sup>                                                           | Lab collection |
| pET30a-PhoQ                            | pET-30a::PhoQ, expressing sensor region of PhoQ, Kan <sup>r</sup>                                                                                   | Lab collection |

---



**Supplementary Table 2.** Primers used in this study

| Primer name     | Sequence (forward/reverse)                                                                                                                                     | Length of products/description                                                  |
|-----------------|----------------------------------------------------------------------------------------------------------------------------------------------------------------|---------------------------------------------------------------------------------|
| $\Delta$ prc    | A: <u>TCTAGACTGGGCGAAACGATGGAG</u><br>B: <u>GCATGCTGCATTGGTGTAGGCGTTGAG</u><br>C: <u>GCATGCCAAGTACTGCCGCAATCGAC</u><br>D: <u>AAGCTTGGCACTGATGAGCGTGGG</u>      | AB 1147 bp; CD 666 bp; for $\Delta$ prc construction                            |
| V- $\Delta$ prc | F: GCCCAAGACCCGGATCGAGA<br>R: TTGTTGGTGCTGCCTTCGCT                                                                                                             | WT 3613 bp; $\Delta$ prc 2146 bp; for verification of $\Delta$ prc construction |
| $\Delta$ PDZ    | A: <u>TCTAGACAAACTGGTCTACGGGTTGCTCTCG</u><br>B: <u>GCATGCCGACAGCGACATCTGCTGATTGAAG</u><br>C: <u>GCATGCGTGCGCCTGGCCGAAC</u><br>D: <u>AAGCTTACGCCCTTGCTGGGTG</u> | AB 604 bp; CD 605 bp; for $\Delta$ PDZ construction                             |
| $\Delta$ PEP    | A: <u>TCTAGATGGGCAGCCGACGACAAG</u><br>B: <u>GCATGCCCGGCGCTGTGGCACGTC</u><br>C: <u>GCATGCGCCAGCGTGGATGCCAC</u><br>D: <u>AAGCTTGCTCACCCATCAATGACGCA</u>          | AB 633 bp; CD 559 bp; for $\Delta$ PEP construction                             |
| $\Delta$ DUF    | A: <u>TCTAGACAGCGCCGGATCGGCATCAT</u><br>B: <u>GCATGCGCTGGCCGGAATGCGATGTC</u><br>C: <u>GCATGCAAGGACCAGCCGCTGTCCGC</u><br>D: <u>AAGCTTGGCACTGATGAGCGTGGG</u>     | AB 567 bp; CD 601 bp; for $\Delta$ DUF construction                             |
| V- $\Delta$ PDZ | F: GCATGCGGTGAGCACCAAGTGCCAGCAGGC<br>R: GCATGCGCTGGCCGGAATGCGATGTC                                                                                             | WT 1677 bp; $\Delta$ PDZ 1389 bp; for verification of $\Delta$ PDZ construction |

|                                                       |                                                                                                                                                                 |                                                                                             |
|-------------------------------------------------------|-----------------------------------------------------------------------------------------------------------------------------------------------------------------|---------------------------------------------------------------------------------------------|
| V- $\Delta$ PEP                                       | F: CAAACTGGTCTACGGGTGCTCTCG<br>R: GGCAGTATGAGCGTGGG                                                                                                             | WT 2588 bp;<br>$\Delta$ PEP 2036 bp; for<br>verification of<br>$\Delta$ PEP construction    |
| V- $\Delta$ DUF                                       | F: GTGCGCCTGGCCGAAC<br>R: TTGTTGGTGCTGCCTTCGCT                                                                                                                  | WT 1871 bp;<br>$\Delta$ DUF 1409 bp;<br>for verification of<br>$\Delta$ DUF<br>construction |
| $\Delta$ prc-prc                                      | F: <u>AAGCTT</u> ATGACCTACAACGTTTCTGCGT<br>R: <u>GGTACCT</u> CAGTCAGCCCAGCGACC                                                                                  | 2184 bp; for <i>prc</i><br>complementation                                                  |
| $\Delta$ prc-prc <sub>X00</sub>                       | F: <u>AAGCTT</u> ATGAAGGCCGGCCTGCTG<br>R: <u>GGTACCT</u> CAATCCGCCCAACGCCCCG                                                                                    | 2160bp; for <i>prc</i><br>heterogenetic<br>complementation                                  |
| $\Delta$ prc-prc-HA-Flag <sup>S47</sup> <sub>5A</sub> | F: <u>AAGCTT</u> ATGACCTACAACGTTTCTGCGT<br>R: <u>GGTACCT</u> CACTTGTCTGTCGTCGTCCTTGTAGTCGACCTTGAGAGCG<br>TAATCTGGAACATCGTATGGGTAGTCAGCCCAGCGACCC                | 2244 bp; for<br>overexpression<br>prc-HA-Flag and<br>prc-HA-Flag <sup>S475A</sup>           |
| prc <sup>S475A</sup>                                  | F: TGATCAACCGCGGCTCGGCTGCGGCGTCGGAAATT<br>R: CAGCCGAGCCGCGGTTGATCAGCACGCCAGCG                                                                                   | for prc <sup>S475A</sup> site<br>mutation<br>construction                                   |
| prc <sup>K500A</sup>                                  | F: ATTGGTGAAACCACCTTCGGCGCGGGCACGGTGCAGAAC<br>R: GCGCCGAAGGTGGTTTACCAATGACCAGACCGC                                                                              | for prc <sup>K500A</sup> site<br>mutation<br>construction                                   |
| $\Delta$ vgrS $\Delta$ 9                              | A: <u>GGATCCC</u> GACATCGCCGCCAATC<br>B: <u>CATATG</u> CATCACGTCCTCCACCAGCT<br>C: <u>CATATG</u> CAGCGGTTCTATTCCGATCCG<br>D: <u>GCATGCG</u> CCATCCTGGGTGTATTTGAC | AB 821 bp; CD<br>888 bp; for vgrS <sup><math>\Delta</math>9</sup><br>construction           |
| V- $\Delta$ vgrS $\Delta$ 9                           | F: CCGATGATCCAGACCCGTC                                                                                                                                          | WT 253 bp; for                                                                              |

|                                |                                                                                                                                                     |                                                           |
|--------------------------------|-----------------------------------------------------------------------------------------------------------------------------------------------------|-----------------------------------------------------------|
|                                | R: TGCGAACGCGTCGATATTG                                                                                                                              | verification of vgrS <sup>Δ9</sup> construction           |
| ΔvgrS-vgrS <sup>A9G</sup>      | F: CCGCAATATCGACGCGTTTCGGACAGCGGTTCTATTCT<br>R: CCGAACGCGTCGATATTGCGGTTTCAT                                                                         | For ΔvgrS-vgrS with A9G site mutation construction        |
| ΔvgrS-vgrS <sup>A9G-Q10A</sup> | F: AATATCGACGCGTTTCGGAGCGCGGTTCTATTCCG<br>R: GCTCCGAACGCGTCGATATTGCGGTTTCAT                                                                         | For ΔvgrS-vgrS with A9G-Q10A double mutation construction |
| 3HA-vgrS <sup>A9G</sup>        | F: CGCTAATATCGACGCGTTTCGGACAGCGGTTCTATTCT<br>R: CCGAACGCGTCGATATTAGCGTAATCTGGAACATC                                                                 | for 3HA-vgrS with A9G site mutation construction          |
| 3HA-vgrS <sup>A9G-Q10A</sup>   | F: CGCTAATATCGACGCGTTTCGGAGCGCGGTTCTATTCCGA<br>R: GCTCCGAACGCGTCGATATTAGCGTAATCTGGAACATC                                                            | for 3HA-vgrS with A9G-Q10A double mutation construction   |
| ΔvgrS-3HA-vgrS                 | F: <u>GTCGACATGAACCGCTACCCATACGATGTTCCAGAT</u><br>TACGCTAATATCGACGCGTTTCGCAC<br>R: <u>GAGCTCTTAGCGATGGAACGCCAGTG</u>                                | 1184 bp; for overexpression 3HA-vgrS                      |
| ΔvgrS-3×Flag-vgrS              | F: GTCGACATGGACTACAAGGACGACGACGACAAGGACTACAAGGACGACGACGACAAGGACTACAAGGAC<br>GACGACGACAAG AACCGCAATATCGACGCG<br>R: <u>GAGCTCTTAGCGATGGAACGCCAGTG</u> | 1229 bp; for overexpression 3×Flag-vgrS                   |
| Δ0943                          | A: GAATTCGTTTCGCTACGCCTGTATG<br>B: GGATCCCTTGAGTTTGGCTTGATGGAA<br>C: GGATCCCTGACCGTGCTGCCCTAC                                                       | AB 319 bp; CD 373 bp; for Δ0943 construction              |

|         |                                                                                                                                    |                                                                  |
|---------|------------------------------------------------------------------------------------------------------------------------------------|------------------------------------------------------------------|
|         | D: AAGCTTCGCATTGGCTGGAGCAG                                                                                                         |                                                                  |
| Δ2164   | A: GAATTCTTGCGTGGGAAGTATTGCG<br>B: GGATCCCTGCTCGGCCTGCTGCTC<br>C: GGATCCGCAAAGTGGCTGCTGGAACA<br>D: AAGCTTGACCACAGACCATGCCGATT      | AB 320 bp; CD 344 bp; for Δ2164 construction                     |
| Δ0690   | A: TCTAGAATGGGCAGAAAACGAAGTCAA<br>B: CATATGGTTCGTAGGCGAGGGAACCAC<br>C: CATATGCGGCTGGAACGAGCAGGACA<br>D: AAGCTTGCCTCGCAGCAACCATTACA | AB 259 bp; CD 433 bp; for Δ0690 construction                     |
| Δ3300   | A: GGATCCTCTTCACGCACCTGCCCAA<br>B: AAGCTTGCCGTCGATCGACCAGTTC<br>C: AAGCTTACCAAGAACGGCGTTGATGC<br>D: CTGCAGCGTGCTGCCAGTGCAGTTTCG    | AB bp; CD bp; for Δ3300 construction                             |
| Δ3301   | A: GGATCCCATCCAGAGCCATCGGGG<br>B: AAGCTTGACCGGATTCACCGACACCG<br>C: AAGCTTATTCTCAATCGCGCGGCC<br>D: CTGCAGCACATCGCTACGGTGTCGATC      | AB bp; CD bp; for Δ3301 construction                             |
| Δ3576   | A: GGATCCGCGTGACGTCTATCACGCTT<br>B: AAGCTTCGCACTGGCGGAAAGG<br>C: AAGCTTTCGGCGATGTTGAACATGTC<br>D: CTGCAGTTGGCCGGCCAAGCCAC          | AB 448 bp; CD 297 bp; for Δ3576 construction                     |
| V-Δ0943 | F: AAGCGATTGATGCGGCG<br>R: GCTGTACCCGAACGTGGACT                                                                                    | WT 1363 bp; Δ0943 980 bp; for verification of Δ0943 construction |
| V-Δ2164 | F: CCCGTAAGGGCGGAATAG<br>R: GCCACGATGTTACGGTTATTTT                                                                                 | WT 1240 bp; Δ2164 890 bp; for verification of Δ2164              |

|         |                                                                               |                                                                               |
|---------|-------------------------------------------------------------------------------|-------------------------------------------------------------------------------|
|         |                                                                               | construction                                                                  |
| V-Δ0690 | F: CCACCGAGGGTTCGTTCA<br>R: CCGTGCTGAGTTGTCCCAC                               | WT 1597 bp;<br>Δ0690 1034 bp;<br>for verification of<br>Δ0690<br>construction |
| V-Δ3300 | F: CAATTCAGGTCGGGCGGGC<br>R: TAGGGCTGCGCCAGCACG                               | WT 1847 bp;<br>Δ3300 1109 bp;<br>for verification of<br>Δ3300<br>construction |
| V-Δ3301 | F: CGGCAGTGAGAATTTTCTTG<br>R: GAAGGGTGCTGTGCAT                                | WT 1876 bp;<br>Δ3301 1153 bp;<br>for verification of<br>Δ3301<br>construction |
| V-Δ3576 | F: GGTGGCTGTTTTCCAAAGA<br>R: TTGGGTCGGTTCCTGA                                 | WT 7631 bp;<br>Δ3576 983 bp; for<br>verification of<br>Δ3576<br>construction  |
| Pro-Prc | F: <u>CATATG</u> ACCTACAACGTTTCTGCGTCCC<br>R: <u>AAGCTT</u> GTCAGCCCAGCGACCCG | 2178 bp; for full<br>length protein Prc<br>expression                         |
| Pro-PDZ | F: <u>CATATG</u> CTGGAAGGCATCGGCG<br>R: <u>AAGCTT</u> CTTCTGCCGCGTCAGGG       | 288 bp; for<br>expressing the<br>PDZ domain of<br>Prc                         |
| Pro-PEP | F: <u>CATATG</u> ATCGGCATCATCAAAGTCC<br>R: <u>AAGCTT</u> CGGGAATGCGATGTCCG    | 552 bp; for<br>expressing the                                                 |

|                          |                                                                                              |                                                                         |
|--------------------------|----------------------------------------------------------------------------------------------|-------------------------------------------------------------------------|
|                          |                                                                                              | PEP domain of Prc                                                       |
| Pro-DUF                  | F: <u>CATATGGTGGATGCCACCGAATTC</u><br>R: <u>AAGCTTGGACAACAACCCAGCG</u>                       | 462 bp; for expressing the DUF domain of Prc                            |
| pro-PEP+DUF $\Delta$ 20  | F: <u>CATATGCAGGATTTCGAAGGCCGTCG</u><br>R: <u>AAGCTTGGCCGCCGATTCGTGC</u>                     | 960 bp; for expressing the PEP+DUF $\Delta$ <sup>20</sup> domain of Prc |
| pro- $\Delta$ PDZ        | F: <u>CATATGCAGGATTTCGAAGGCCGTCG</u><br>R: <u>AAGCTTGGCCGCCGATTCGTGC</u>                     | 960 bp; for expressing the Prc without PDZ domain                       |
| pro- $\Delta$ PEP        | F: <u>CATATGCAGGATTTCGAAGGCCGTCG</u><br>R: <u>AAGCTTGGCCGCCGATTCGTGC</u>                     | 960 bp; for expressing the Prc without PEP domain                       |
| pro- $\Delta$ DUF        | F: <u>CATATGCAGGATTTCGAAGGCCGTCG</u><br>R: <u>AAGCTTGGCCGCCGATTCGTGC</u>                     | 960 bp; for expressing the Prc without DUF domain                       |
| pro-3R-VgrS              | F: GCTCATATGCGACGACGACGAATGAACCGCAATATCGACGC<br>R: CCGCTCGAGGCGATGGAACGCCAGTGTTG             | 1167 bp; for the 3R-VgrS expression                                     |
| pro-4R-VgrS              | F: GCTCATATGCGACGACGACGAATGAACCGCAATATCGACGC<br>R: GCTCATATGCGACGACGACGAATGAACCGCAATATCGACGC | 1170 bp; for the 4R-VgrS expression                                     |
| pro-3 $\times$ Flag-VgrS | F:                                                                                           | 1230 bp; for the                                                        |

|                                          |                                                                                                                                                        |                                                                                                    |
|------------------------------------------|--------------------------------------------------------------------------------------------------------------------------------------------------------|----------------------------------------------------------------------------------------------------|
|                                          | CATATGGACTACAAGGACGACGACGACAAGGACTACAAGGACGACGACGACAAGGACTACAAGGACGACG<br>ACGACAAG ATGAACCGCAATATCGACGC<br>R: GTCATATGCGACGACGACGAATGAACCGCAATATCGACGC | 3×Flag -VgrS<br>expression                                                                         |
| pro-VgrS-sensor                          | F: CATATGAACCGCAATATCGACGC<br>R: CTCGAGGGTGCGCTTGAGCTGGA                                                                                               | 297 bp; for the<br>VgrS sensor<br>expression                                                       |
| pro-VgrS-sensor <sup>A9G</sup>           | F: CGCAATATCGACGCGTTCGGACAGCGGTTCTATTC<br>R: CCGAACGCGTCGATATTGCGGTTTCATATG                                                                            | for VgrS sensor<br>with A9G<br>mutation<br>expression                                              |
| pro-VgrS-sensor <sup>A9G-<br/>Q10A</sup> | F: GCAATATCGACGCGTTCGGAGCGCGGTTCTATTCCGAT<br>R: GCTCCGAACGCGTCGATATTGCGGTTTCATATG                                                                      | for VgrS sensor<br>with A9G-Q10A<br>double site<br>mutation<br>expression                          |
| pro-3×Flag-VgrS-sensor                   | F:<br>CATATGGACTACAAGGACGACGACGACAAGGACTACAAGGACGACGACGACAAGGACTACAAGGACGACG<br>ACGACAAG ATGAACCGCAATATCGACGC<br>R: CCGCTCGAGGGTGCGCTTGAGCTGGATC       | 273 bp; for the<br>3×Flag -VgrS<br>sensor expression                                               |
| qRT-Prc                                  | F: TGTGGCGGCAGTCGGTGAT<br>R: GCATTGGTGTAGGCGTTGAGGA                                                                                                    | 169 bp; for for<br>real time PCR<br>analysis to check<br>the expression<br>level of <i>prc</i>     |
| qRT-0943                                 | F: CAACCGCGAGATCGAAGACG<br>R: GCTGGAATGGGCTGAGGAA                                                                                                      | 128 bp; for for<br>real time PCR<br>analysis to check<br>the expression<br>level of <i>XC_0943</i> |
| qRT-2164                                 | F: AAGATGGCTGCCTTTGGAC<br>R: CACATTCGCTGGGTTTCG                                                                                                        | 164 bp; for real<br>time PCR analysis<br>to check the<br>expression level of                       |

|          |                                                          |                                                                                    |
|----------|----------------------------------------------------------|------------------------------------------------------------------------------------|
|          |                                                          | <i>yciE</i>                                                                        |
| qRT-3300 | F: AAGTGCCCGACCTCCCA<br>R: TGCCCTTCGAGTCGGTGT            | 208 bp; for real time PCR analysis to check the expression level of <i>XC_3300</i> |
| qRT-3301 | F: CGATGCCACTGACCACGCTTAC<br>R: TCTGCCGGACCCACTCAACG     | 210 bp; for real time PCR analysis to check the expression level of <i>XC_3301</i> |
| tmRNA    | F: CCAACGACGACAACACTACGGT<br>R: ACGAGCACGGGCACAAG        | 111 bp for real time PCR as internal control                                       |
| P0711    | F: CAGTTGGGTGGTCTGTCCG<br>R: CCGCCATTATCGGGC             | 362 bp; probe for EMSA, also for ChIP-qPCR amplification                           |
| P0943    | F: CGTTCGCTACGCCTGTAT<br>R: CCCAGTCTGAACCTGACT           | 186 bp; probe for EMSA, also for ChIP-qPCR amplification                           |
| P2164    | F: AGGCAGCGACAAGCCAGTG<br>R: CGGGGTCTCCTGTTGTCTACG       | 205 bp; probe for EMSA, also for ChIP-qPCR amplification                           |
| P3300    | F: ACTTGGACACGGTCTTTCACG<br>R: GTATACAGCTCCTTCTTTGGGAGAT | 309 bp; probe for EMSA                                                             |
| P3301    | F: GCGTTAACGGTCATATAACATGTGA<br>R: CGGAGCGCTCCTAGTGGG    | 301 bp; probe for EMSA                                                             |
| P0769    | F: ACCCCACCGGTATCTTCA                                    | 236 bp; unspecific                                                                 |



|                  |                                              |                                                                       |
|------------------|----------------------------------------------|-----------------------------------------------------------------------|
|                  | R: CAGCATGTAGCCCTCGTT                        | probe for EMSA                                                        |
| 0710-a<br>0711-b | CATGTGGGAAGTCGAAGACG<br>AGCAGTTCAACGCCGGTAG  | 335bp; for<br>0710-0711<br>intergenic<br>transcript<br>identification |
| 0711-c<br>0712-d | ACTCCTCCAGTGGCAAATACGT<br>TGCATTGCACGCCAGACC | 213bp; for<br>0711-0712<br>intergenic<br>transcript<br>identification |
| 0712-e<br>0713-f | AACCGTTCCACCGCATCAA<br>TGTCGCCACCGATCTGCTT   | 299bp; for<br>0712-0713<br>intergenic<br>transcript<br>identification |
| 0713-g<br>Prc-h  | CCGATGGTGCGTTCCTCGTA<br>TTGGTCGCCGTCGCCTGTT  | 420bp; for<br>0713-Prc<br>intergenic<br>transcript<br>identification  |
| Prc-i<br>0715-j  | GAATCGGCGGCCATCCT<br>GCGTGTTCTTCGGCACCTT     | 280bp; for<br>Prc-0715<br>intergenic<br>transcript<br>identification  |
| Prc-k<br>Prc-l   | GTGGATGCCACCGAATTC<br>GGACAACAACCCAGCG       | 462bp; for operon<br>identification,<br>positive control              |

**Supplementary Table 3.** Proteins identified by tandem-affinity purification (TAP) under osmostress-treated or untreated conditions

| Protein code <sup>a</sup>               | Annotation or description                        | Score <sup>b</sup> | Theoretical MW(Da) <sup>c</sup> | Osmostress        |
|-----------------------------------------|--------------------------------------------------|--------------------|---------------------------------|-------------------|
| <b>1. Transport Protein</b>             |                                                  |                    |                                 |                   |
| XC_1141                                 | Translocation protein TolB                       | 20.18              | 47034.7                         | Treated           |
| <b>2. Signal Transduction</b>           |                                                  |                    |                                 |                   |
| <i>vgrS</i>                             | Two-component system sensor protein              | 80.26              | 42693.2                         | Untreated         |
| XC_3452                                 | Two-component system regulatory protein          | 20.19              | 28107.1                         | Untreated         |
| <b>3. Transcription and Translation</b> |                                                  |                    |                                 |                   |
| XC_3317                                 | 30S ribosomal protein S4                         | 30.16              | 23280.7                         | Treated           |
| XC_0829                                 | L-isoaspartate protein carboxylmethyltransferase | 30.24              | 24078.5                         | Untreated         |
| XC_2863                                 | 30S ribosomal protein S2                         | 30.29              | 30168.3                         | Untreated         |
| XC_3342                                 | Elongation factor Tu                             | 50.23              | 43171.2                         | Untreated/Treated |
| XC_3354                                 | Elongation factor Tu                             | 50.23              | 43185.2                         | Untreated/Treated |
| <b>4. Cell Structures and Division</b>  |                                                  |                    |                                 |                   |
| XC_1619                                 | Oar protein                                      | 20.24              | 117750.6                        | Untreated         |
| XC_1625                                 | PilY1 protein                                    | 20.24              | 130606.9                        | Untreated         |
| XC_3122                                 | Septum site-determining protein                  | 30.17              | 28938.0                         | Untreated         |
| XC_3300                                 | Outer membrane protein                           | 30.24              | 39362.0                         | Untreated/Treated |
| XC_2958                                 | Beta-hexosaminidase                              | 130.33             | 34515.9                         | Untreated/Treated |
| <b>5. Fatty Acid Metabolism</b>         |                                                  |                    |                                 |                   |
| XC_3652                                 | Beta-ketoacyl-[ACP] synthase I                   | 40.27              | 41937.2                         | Untreated         |
| XC_0851                                 | Inorganic pyrophosphatase                        | 20.16              | 19712.4                         | Untreated         |

|                                       |                                             |       |          |                   |
|---------------------------------------|---------------------------------------------|-------|----------|-------------------|
| <b>6. Amino Acid Metabolism</b>       |                                             |       |          |                   |
| XC_3358                               | Ribose-phosphate pyrophosphokinase          | 20.22 | 34513.7  | Untreated         |
| <b>7. Nucleotide Metabolism</b>       |                                             |       |          |                   |
| XC_3346                               | DNA-directed RNA polymerase subunit beta'   | 30.15 | 155280.8 | Treated           |
| XC_3347                               | DNA-directed RNA polymerase subunit beta    | 20.15 | 154862.6 | Treated           |
| XC_2346                               | Carbamoyl phosphate synthase large subunit  | 30.18 | 117276.3 | Untreated         |
| XC_2534                               | CTP synthetase                              | 20.18 | 61513.7  | Untreated         |
| XC_2348                               | Carbamoyl phosphate synthase small subunit  | 30.22 | 40264.5  | Untreated         |
| XC_2509                               | Recombinase A                               | 20.18 | 37017.4  | Untreated         |
| XC_3316                               | DNA-directed RNA polymerase subunit alpha   | 20.16 | 36363.3  | Untreated         |
| <b>8. Carbohydrate Metabolism</b>     |                                             |       |          |                   |
| XC_0972                               | Glyceraldehyde-3-phosphate dehydrogenase    | 20.13 | 35984.9  | Treated           |
| XC_1578                               | Acetyl-CoA carboxylase subunit beta         | 24.15 | 32013.7  | Treated           |
| XC_2977                               | 3-hydroxyisobutyrate dehydrogenase          | 20.22 | 29510.9  | Untreated         |
| XC_1930                               | UTP-glucose-1-phosphate uridylyltransferase | 20.22 | 32101.6  | Untreated         |
| XC_0979                               | Fructose-bisphosphatealdolase               | 20.20 | 36276.2  | Untreated         |
| XC_3627                               | GDP-mannose 4,6-dehydratase                 | 90.28 | 38744.9  | Untreated/Treated |
| <b>9. Energy Metabolism</b>           |                                             |       |          |                   |
| XC_1595                               | NADH dehydrogenase subunit G                | 40.27 | 79082.8  | Untreated/Treated |
| XC_3678                               | ATP synthase F0F1 subunit beta              | 30.22 | 50996.5  | Untreated/Treated |
| XC_3680                               | ATP synthase F0F1 subunit alpha             | 20.23 | 55323.6  | Untreated/Treated |
| <b>10. Small Molecules Metabolism</b> |                                             |       |          |                   |

|                                                  |                                   |        |          |                   |
|--------------------------------------------------|-----------------------------------|--------|----------|-------------------|
| XC_0713                                          | Lipoyl synthase                   | 50.26  | 36895.9  | Untreated         |
| XC_1845                                          | N-ethylmethylmalonyl-CoA lyase    | 20.24  | 48513.0  | Untreated         |
| XC_2761                                          | pyridoxine kinase                 | 40.26  | 31915.2  | Untreated/Treated |
| <b>11. Degradative Enzymes</b>                   |                                   |        |          |                   |
| XC_0256                                          | Acyl-CoA dehydrogenase            | 20.13  | 41503.3  | Untreated         |
| XC_0714                                          | Tail-specific protease            | 340.31 | 79988.6  | Untreated/Treated |
| <b>12. Protein Maintenance and Folding</b>       |                                   |        |          |                   |
| XC_2763                                          | Molecular chaperone DnaK          | 20.16  | 68836.8  | Treated           |
| XC_0535                                          | Molecular chaperone GroEL         | 20.18  | 57183.9  | Untreated/Treated |
| <b>13. Oxidation-Reduction Process</b>           |                                   |        |          |                   |
| XC_3396                                          | Alkyl hydroperoxide reductase     | 20.15  | 20432.1  | Untreated         |
| <b>14. Virulence, Resistance, and Adaptation</b> |                                   |        |          |                   |
| XC_0009                                          | Biopolymer transport ExbB protein | 20.19  | 26666.2  | Untreated         |
| <b>15. Hypothetical Protein</b>                  |                                   |        |          |                   |
| XC_0538                                          | Hypothetical protein XC_0538      | 50.24  | 100325.1 | Treated           |
| XC_4310                                          | Hypothetical protein XC_4310      | 30.20  | 89711.1  | Untreated         |
| XC_0215                                          | Hypothetical protein XC_0215      | 30.20  | 21846.7  | Untreated/Treated |

<sup>a</sup> Protein code is based on the genomic annotation of *X. campestris* pv. *campestris* 8004.

<sup>b</sup> Score is the result of SEQUEST search, Score > 20 was regarded as significant difference ( $P < 0.05$ ).

<sup>c</sup> MW: molecular weight.

**Supplementary Table 4.** ChIP-seq analysis identifies genes with promoter regions bound by VgrR in *X. campestris* pv. *campestris* stimulated by osmostress

| Gene <sup>a</sup>                                       | Gene Function                           | Strand | Score | Peak Start:Peak End | Peak position | Direction |
|---------------------------------------------------------|-----------------------------------------|--------|-------|---------------------|---------------|-----------|
| <b>WT-vgrR-his<sub>6</sub></b>                          |                                         |        |       |                     |               |           |
| <b>01. Transport Protein</b>                            |                                         |        |       |                     |               |           |
| <a href="#">XC_0849</a>                                 | TonB-dependent receptor                 | +      | 241   | 1025491:1025790     | 1025641       | ui        |
| <b>02. Signal Transduction</b>                          |                                         |        |       |                     |               |           |
| <a href="#">XC_0850</a>                                 | response regulator                      | -      | 188   | 1030551:1030850     | 1030701       | u         |
| <a href="#">XC_1049</a>                                 | two-component system regulatory protein | +      | 396   | 1265632:1265931     | 1265782       | i         |
| <b>03. Transcription, Translation, and Modification</b> |                                         |        |       |                     |               |           |
| <a href="#">XC_4364</a>                                 | Thr tRNA                                | -      | 194   | 3695521:3695820     | 3695671       | u         |
| <a href="#">XC_3230</a>                                 | 50S ribosomal protein L32               | -      | 238   | 3875863:3876162     | 3876013       | ui        |
| <a href="#">XC_3308</a>                                 | peptidyl-prolyl cis-trans isomerase     | -      | 186   | 3962296:3962595     | 3962446       | ui        |
| <a href="#">XC_3309</a>                                 | GTP-binding elongation factor protein   | +      | 186   | 3962296:3962595     | 3962446       | u         |
| <a href="#">XC_3438</a>                                 | peptidyl-prolyl cis-trans isomerase     | +      | 231   | 4088083:4088382     | 4088233       | ui        |
| <a href="#">XC_3843</a>                                 | RNA polymerase sigma-32 factor          | -      | 206   | 4541163:4541462     | 4541313       | i         |
| <a href="#">XC_4383</a>                                 | 23sRNA                                  | -      | 247   | 4632753:4633052     | 4632903       | i         |
| <a href="#">XC_3945</a>                                 | arginine--tRNA ligase                   | +      | 211   | 4658019:4658318     | 4658169       | i         |
| <a href="#">XC_4390</a>                                 | 23sRNA                                  | -      | 242   | 5020267:5020566     | 5020417       | i         |
| <a href="#">XC_4393</a>                                 | 16sRNA                                  | -      | 251   | 5023342:5023641     | 5023492       | d         |
| <b>04. Cell Structures and Division</b>                 |                                         |        |       |                     |               |           |
| <a href="#">XC_0691</a>                                 | rod shape-determining protein           | +      | 179   | 829695:829994       | 829845        | u         |
| <a href="#">XC_0937</a>                                 | fimbrial assembly protein               | -      | 191   | 1126440:1126739     | 1126590       | i         |

|                                    |                                                                              |   |     |                 |         |    |
|------------------------------------|------------------------------------------------------------------------------|---|-----|-----------------|---------|----|
| <a href="#">XC_0941</a>            | <a href="#">fimbrial assembly membrane protein</a>                           | - | 324 | 1129598:1129897 | 1129748 | ui |
| <a href="#">XC_0942</a>            | <a href="#">penicillin-binding protein 1A</a>                                | + | 324 | 1129598:1129897 | 1129748 | u  |
| <a href="#">XC_0969</a>            | <a href="#">outer membrane protein</a>                                       | - | 216 | 1163156:1163455 | 1163306 | u  |
| <a href="#">XC_1619</a>            | <a href="#">Oar protein</a>                                                  | + | 288 | 1940371:1940670 | 1940521 | ui |
| <a href="#">XC_2869</a>            | <a href="#">undecaprenyl pyrophosphate synthetase</a>                        | + | 181 | 3449055:3449354 | 3449205 | ui |
| <a href="#">XC_3259</a>            | <a href="#">murein hydrolase D</a>                                           | + | 215 | 3900468:3900767 | 3900618 | i  |
| <a href="#">XC_3278</a>            | <a href="#">UDP-2,3-diacetylglucosamine hydrolase</a>                        | + | 191 | 3925724:3926023 | 3925874 | i  |
| <a href="#">XC_3300</a>            | <a href="#">outer membrane protein</a>                                       | - | 232 | 3952153:3952452 | 3952303 | ui |
| <a href="#">XC_3504</a>            | <a href="#">UDP-3-O-[3-hydroxymyristoyl] N-acetylglucosamine deacetylase</a> | - | 383 | 4162419:4162718 | 4162569 | d  |
| <a href="#">XC_3515</a>            | <a href="#">penicillin-binding protein 3</a>                                 | - | 184 | 4178501:4178800 | 4178651 | u  |
| <a href="#">XC_3576</a>            | <a href="#">outer membrane protein</a>                                       | - | 289 | 4250782:4251081 | 4250932 | u  |
| <a href="#">XC_3814</a>            | <a href="#">lipopolysaccharide core biosynthesis glycosyl transferase</a>    | + | 201 | 4508266:4508565 | 4508416 | ui |
| <b>05. Carbohydrate Metabolism</b> |                                                                              |   |     |                 |         |    |
| <a href="#">XC_0493</a>            | <a href="#">bacterioferritin-associated ferredoxin</a>                       | - | 225 | 581363:581662   | 581513  | d  |
| <a href="#">XC_0690</a>            | <a href="#">sugar kinase</a>                                                 | - | 179 | 829695:829994   | 829845  | ui |
| <a href="#">XC_0972</a>            | <a href="#">glyceraldehyde-3-phosphate dehydrogenase</a>                     | + | 189 | 1164704:1165003 | 1164854 | ui |
| <a href="#">XC_0979</a>            | <a href="#">fructose-bisphosphate aldolase</a>                               | + | 195 | 1174888:1175187 | 1175038 | ui |
| <a href="#">XC_3251</a>            | <a href="#">3-deoxy-D-manno-octulosonic acid kinase</a>                      | - | 202 | 3894583:3894882 | 3894733 | u  |
| <b>06. Energy metabolism</b>       |                                                                              |   |     |                 |         |    |
| <a href="#">XC_3082</a>            | <a href="#">cytochrome O ubiquinol oxidase subunit III</a>                   | - | 208 | 3691863:3692162 | 3692013 | u  |
| <a href="#">XC_3604</a>            | <a href="#">flavoprotein-ubiquinone oxidoreductase</a>                       | + | 197 | 4283446:4283745 | 4283596 | u  |
| <a href="#">XC_3680</a>            | <a href="#">ATP synthase alpha chain</a>                                     | - | 223 | 4368610:4368909 | 4368760 | i  |
| <b>07. Amino Acid Metabolism</b>   |                                                                              |   |     |                 |         |    |

|                                       |                                                         |   |     |                 |         |    |
|---------------------------------------|---------------------------------------------------------|---|-----|-----------------|---------|----|
| <a href="#">XC_0530</a>               | 3-dehydroquinate dehydratase                            | - | 217 | 626188:626487   | 626338  | u  |
| <a href="#">XC_1608</a>               | 30S ribosomal protein S15                               | + | 204 | 1930173:1930472 | 1930323 | ui |
| <a href="#">XC_3544</a>               | serine hydroxymethyltransferase                         | - | 197 | 4207201:4207500 | 4207351 | i  |
| <a href="#">XC_3635</a>               | cystathionine gamma-lyase-like protein                  | - | 198 | 4318076:4318375 | 4318226 | i  |
| <b>08. Nucleotide Metabolism</b>      |                                                         |   |     |                 |         |    |
| <a href="#">XC_0265</a>               | nuclease                                                | + | 215 | 318762:319061   | 318912  | u  |
| <a href="#">XC_0589</a>               | RNA-directed DNA polymerase                             | + | 213 | 704416:704715   | 704566  | u  |
| <a href="#">XC_1609</a>               | polynucleotide phosphorylase                            | + | 196 | 1932036:1932335 | 1932186 | i  |
| <a href="#">XC_1614</a>               | phosphoribosylaminoimidazole carboxylase ATPase subunit | + | 198 | 1936388:1936687 | 1936538 | ui |
| <a href="#">XC_2749</a>               | oxoglutarate dehydrogenase                              | + | 188 | 3302860:3303159 | 3303010 | i  |
| <a href="#">XC_3244</a>               | DNA polymerase III tau and gamma subunits               | - | 187 | 3889889:3890188 | 3890039 | u  |
| <a href="#">XC_3282</a>               | amidophosphoribosyltransferase                          | - | 211 | 3930951:3931250 | 3931101 | ui |
| <a href="#">XC_RS21975</a>            | RNase_P_RNA                                             | - | 201 | 4182477:4182776 | 4182627 | ui |
| <a href="#">XC_3603</a>               | DNA repair system specific for alkylated DNA            | - | 197 | 4283446:4283745 | 4283596 | ui |
| <b>09. Small Molecules Metabolism</b> |                                                         |   |     |                 |         |    |
| <a href="#">XC_0713</a>               | lipoic acid synthetase                                  | + | 208 | 856218:856517   | 856368  | i  |
| <a href="#">XC_2653</a>               | imidazolonepropionase                                   | - | 200 | 3192301:3192600 | 3192451 | ui |
| <a href="#">XC_2654</a>               | atrazine chlorohydrolase                                | + | 200 | 3192301:3192600 | 3192451 | ui |
| <a href="#">XC_4102</a>               | reductase/halogenase                                    | + | 212 | 4829154:4829453 | 4829304 | u  |
| <b>11. Degradive Enzymes</b>          |                                                         |   |     |                 |         |    |
| <a href="#">XC_0714</a>               | tail-specific protease                                  | + | 312 | 856865:857164   | 857015  | u  |
| <a href="#">XC_3195</a>               | integral membrane proteinase subunit                    | - | 184 | 3830111:3830410 | 3830261 | u  |
| <a href="#">XC_3377</a>               | extracellular protease                                  | - | 216 | 4028304:4028603 | 4028454 | u  |

|                                                     |                                         |   |     |                 |         |    |
|-----------------------------------------------------|-----------------------------------------|---|-----|-----------------|---------|----|
| <a href="#">XC_3832</a>                             | protease IV                             | - | 202 | 4528630:4528929 | 4528780 | i  |
| <a href="#">XC_4009</a>                             | peptidase                               | - | 202 | 4727419:4727718 | 4727569 | i  |
| <b>12. Regulatory Function</b>                      |                                         |   |     |                 |         |    |
| <a href="#">XC_0486</a>                             | CRP-like protein Clp                    | - | 205 | 575741:576040   | 575891  | i  |
| <a href="#">XC_3720</a>                             | leucine responsive regulatory protein   | + | 192 | 4407079:4407378 | 4407229 | u  |
| <a href="#">XC_3966</a>                             | transcriptional regulator tetR family   | + | 237 | 4683390:4683689 | 4683540 | ui |
| <b>13. Pathogenicity, Virulence, and Adaptation</b> |                                         |   |     |                 |         |    |
| <a href="#">XC_0639</a>                             | cellulase                               | - | 211 | 766711:767010   | 766861  | i  |
| <a href="#">XC_1141</a>                             | TolB protein                            | + | 209 | 1383632:1383931 | 1383782 | i  |
| <a href="#">XC_3608</a>                             | phosphoglucomutase; phosphomannomutase  | + | 203 | 4289410:4289709 | 4289560 | i  |
| <a href="#">XC_3809</a>                             | phosphinothricin acetyltransferase      | - | 203 | 4503968:4504267 | 4504118 | u  |
| <a href="#">XC_4223</a>                             | OmpA-related protein                    | + | 231 | 4992575:4992874 | 4992725 | u  |
| <b>14. Mobile Genetic Elements</b>                  |                                         |   |     |                 |         |    |
| <a href="#">XC_2777</a>                             | phage-related protein                   | - | 400 | 3334306:3334605 | 3334456 | d  |
| <b>15. Oxidation-Reduction Process</b>              |                                         |   |     |                 |         |    |
| <a href="#">XC_2164</a>                             | ferritin-like domain-containing protein | - | 281 | 2610300:2610599 | 2610450 | u  |
| <a href="#">XC_3301</a>                             | oxidoreductase                          | + | 232 | 3952153:3952452 | 3952303 | ui |
| <b>16. Hypothetical Protein</b>                     |                                         |   |     |                 |         |    |
| <a href="#">XC_0943</a>                             | hypothetical protein                    | + | 265 | 1132766:1133065 | 1132916 | ui |
| <a href="#">XC_1011</a>                             | conserved hypothetical protein          | - | 311 | 1223678:1223977 | 1223828 | ui |
| <a href="#">XC_1012</a>                             | conserved hypothetical protein          | + | 311 | 1223678:1223977 | 1223828 | u  |
| <a href="#">XC_1068</a>                             | conserved hypothetical protein          | - | 212 | 1286065:1286364 | 1286215 | ui |
| <a href="#">XC_1242</a>                             | conserved hypothetical protein          | - | 263 | 1522269:1522568 | 1522419 | ui |



|                         |                                |   |     |                 |         |    |
|-------------------------|--------------------------------|---|-----|-----------------|---------|----|
| <a href="#">XC_1306</a> | conserved hypothetical protein | - | 197 | 1597230:1597529 | 1597380 | ui |
| <a href="#">XC_1534</a> | conserved hypothetical protein | - | 378 | 1843408:1843707 | 1843558 | ui |
| <a href="#">XC_1620</a> | conserved hypothetical protein | + | 181 | 1944784:1945083 | 1944934 | i  |
| <a href="#">XC_2931</a> | hypothetical protein           | + | 283 | 3516867:3517166 | 3517017 | ui |
| <a href="#">XC_3113</a> | conserved hypothetical protein | - | 192 | 3725301:3725600 | 3725451 | u  |
| <a href="#">XC_3238</a> | conserved hypothetical protein | + | 201 | 3882586:3882885 | 3882736 | u  |
| <a href="#">XC_3434</a> | conserved hypothetical protein | + | 201 | 4082880:4083179 | 4083030 | u  |
| <a href="#">XC_3556</a> | conserved hypothetical protein | - | 273 | 4222497:4222796 | 4222647 | ui |
| <a href="#">XC_3595</a> | conserved hypothetical protein | + | 194 | 4274020:4274319 | 4274170 | u  |
| <a href="#">XC_3690</a> | conserved hypothetical protein | - | 208 | 4377907:4378206 | 4378057 | u  |
| <a href="#">XC_3813</a> | conserved hypothetical protein | - | 201 | 4508266:4508565 | 4508416 | u  |
| <a href="#">XC_3823</a> | hypothetical protein           | + | 225 | 4518103:4518402 | 4518253 | u  |
| <a href="#">XC_3956</a> | conserved hypothetical protein | + | 228 | 4674222:4674521 | 4674372 | u  |
| <a href="#">XC_4181</a> | conserved hypothetical protein | + | 208 | 4937298:4937597 | 4937448 | u  |

#### $\Delta$ pre-vgrR-his<sub>6</sub>

| Gene                           | Protein name                            | Strand | Score | Peak Start:Peak End | Summits | Location |
|--------------------------------|-----------------------------------------|--------|-------|---------------------|---------|----------|
| <b>01. Transport Protein</b>   |                                         |        |       |                     |         |          |
| <a href="#">XC_0849</a>        | TonB-dependent receptor                 | +      | 227   | 1025553:1025852     | 1025703 | ui       |
| <a href="#">XC_3295</a>        | ABC transporter sulfate binding protein | -      | 165   | 3947788:3948087     | 3947938 | ui       |
| <b>02. Signal Transduction</b> |                                         |        |       |                     |         |          |
| <a href="#">XC_0850</a>        | response regulator                      | -      | 176   | 1029349:1029648     | 1029499 | i        |
| <a href="#">XC_1049</a>        | two-component system regulatory protein | +      | 394   | 1265615:1265914     | 1265765 | i        |
| <a href="#">XC_1062</a>        | two-component system sensor protein     | -      | 180   | 1280539:1280838     | 1280689 | u        |

| <b>03. Transcription, Translation, and Modification</b> |                                       |   |     |                 |         |    |
|---------------------------------------------------------|---------------------------------------|---|-----|-----------------|---------|----|
| <b>XC_3230</b>                                          | 50S ribosomal protein L32             | - | 231 | 3875838:3876137 | 3875988 | ui |
| <b>XC_4366</b>                                          | Ser tRNA                              | - | 183 | 3890144:3890443 | 3890294 | i  |
| <b>XC_3254</b>                                          | protein phosphatase                   | + | 179 | 3896492:3896791 | 3896642 | ui |
| <b>XC_4367</b>                                          | Ser tRNA                              | - | 179 | 3896492:3896791 | 3896642 | u  |
| <b>XC_3261</b>                                          | peptidyl-prolyl cis-trans isomerase   | - | 200 | 3904937:3905236 | 3905087 | u  |
| <b>XC_3266</b>                                          | peptidyl-prolyl cis-trans isomerase   | - | 208 | 3911808:3912107 | 3911958 | u  |
| <b>XC_3308</b>                                          | peptidyl-prolyl cis-trans isomerase   | - | 198 | 3962364:3962663 | 3962514 | ui |
| <b>XC_3309</b>                                          | GTP-binding elongation factor protein | + | 198 | 3962364:3962663 | 3962514 | ui |
| <b>XC_3363</b>                                          | peptide chain release factor 1        | + | 169 | 4012671:4012970 | 4012821 | u  |
| <b>XC_3643</b>                                          | ATP-dependent RNA helicase            | + | 182 | 4325445:4325744 | 4325595 | u  |
| <b>XC_3806</b>                                          | RNA polymerase sigma-70 factor        | - | 178 | 4501300:4501599 | 4501450 | ui |
| <b>XC_3819</b>                                          | polypeptide deformylase               | - | 195 | 4515189:4515488 | 4515339 | ui |
| <b>XC_3843</b>                                          | RNA polymerase sigma-32 factor        | - | 196 | 4541144:4541443 | 4541294 | i  |
| <b>XC_3889</b>                                          | 30S ribosomal protein S21             | + | 210 | 4593876:4594175 | 4594026 | ui |
| <b>XC_4393</b>                                          | 16sRNA                                | - | 251 | 5023403:5023702 | 5023553 | d  |
| <b>04. Cell Structures and Division</b>                 |                                       |   |     |                 |         |    |
| <b>XC_0691</b>                                          | rod shape-determining protein         | + | 182 | 829641:829940   | 829791  | u  |
| <b>XC_0695</b>                                          | rod shape-determining protein         | + | 192 | 835672:835971   | 835822  | i  |
| <b>XC_0941</b>                                          | fimbrial assembly membrane protein    | - | 322 | 1129599:1129898 | 1129749 | ui |
| <b>XC_0942</b>                                          | penicillin-binding protein 1A         | + | 322 | 1129599:1129898 | 1129749 | ui |
| <b>XC_0970</b>                                          | outer membrane protein                | - | 190 | 1163330:1163629 | 1163480 | i  |
| <b>XC_3300</b>                                          | outer membrane protein                | - | 236 | 3952162:3952461 | 3952312 | ui |

|                                    |                                                     |   |     |                                 |                         |    |
|------------------------------------|-----------------------------------------------------|---|-----|---------------------------------|-------------------------|----|
| <b>XC_3517</b>                     | cell division protein                               | - | 168 | 4179047:4179346                 | 4179197                 | i  |
| <b>XC_3576</b>                     | <a href="#">outer membrane protein</a>              | - | 307 | <a href="#">4250778:4251077</a> | <a href="#">4250928</a> | u  |
| <b>XC_3617</b>                     | aminotransferase                                    | + | 164 | 4297853:4298152                 | 4298003                 | i  |
| <b>XC_3718</b>                     | alanine racemase                                    | - | 171 | 4405847:4406146                 | 4405997                 | ui |
| <b>05. Carbohydrate Metabolism</b> |                                                     |   |     |                                 |                         |    |
| <b>XC_0588</b>                     | pyruvate dehydrogenase                              | + | 177 | 703656:703955                   | 703806                  | i  |
| <b>XC_0690</b>                     | <a href="#">sugar kinase</a>                        | - | 182 | <a href="#">829641:829940</a>   | <a href="#">829791</a>  | u  |
| <b>XC_0978</b>                     | pyruvate kinase type II                             | + | 167 | 1172841:1173140                 | 1172991                 | ui |
| <b>XC_1063</b>                     | succinyl-CoA synthetase beta subunit                | + | 180 | 1280539:1280838                 | 1280689                 | ui |
| <b>XC_3268</b>                     | isocitrate dehydrogenase                            | - | 181 | 3914586:3914885                 | 3914736                 | u  |
| <b>XC_3607</b>                     | 3-oxoadipate CoA-succinyl transferase alpha subunit | - | 187 | 4289011:4289310                 | 4289161                 | u  |
| <b>XC_3613</b>                     | dTDP-glucose-4,6-dehydratase                        | - | 184 | 4295440:4295739                 | 4295590                 | u  |
| <b>XC_3689</b>                     | dihydrolipoamide dehydrogenase                      | - | 178 | 4377252:4377551                 | 4377402                 | u  |
| <b>06. Energy metabolism</b>       |                                                     |   |     |                                 |                         |    |
| <b>XC_1597</b>                     | NADH-ubiquinone oxidoreductase NQO9 subunit         | + | 173 | 1916840:1917139                 | 1916990                 | i  |
| <b>XC_1602</b>                     | NADH-ubiquinone oxidoreductase NQO14 subunit        | + | 174 | 1922548:1922847                 | 1922698                 | i  |
| <b>XC_3083</b>                     | cytochrome O ubiquinol oxidase subunit I            | - | 184 | 3693390:3693689                 | 3693540                 | i  |
| <b>XC_3084</b>                     | cytochrome O ubiquinol oxidase subunit II           | - | 170 | 3694941:3695240                 | 3695091                 | u  |
| <b>XC_3614</b>                     | electron transfer flavoprotein beta subunit         | + | 184 | 4295440:4295739                 | 4295590                 | ui |
| <b>XC_3680</b>                     | <a href="#">ATP synthase alpha chain</a>            | - | 191 | <a href="#">4368872:4369171</a> | <a href="#">4369022</a> | i  |
| <b>07. Amino Acid Metabolism</b>   |                                                     |   |     |                                 |                         |    |
| <b>XC_0530</b>                     | <a href="#">catabolic dehydroquinase</a>            | - | 176 | <a href="#">625922:626221</a>   | <a href="#">626072</a>  | ui |
| <b>XC_3544</b>                     | <a href="#">serine hydroxymethyltransferase</a>     | - | 186 | <a href="#">4207544:4207843</a> | <a href="#">4207694</a> | ui |

| <b>08. Nucleotide Metabolism</b>           |                                               |   |     |                 |         |    |
|--------------------------------------------|-----------------------------------------------|---|-----|-----------------|---------|----|
| <a href="#">XC_0265</a>                    | nuclease                                      | + | 196 | 318525:318824   | 318675  | u  |
| <a href="#">XC_1609</a>                    | polynucleotide phosphorylase                  | + | 161 | 1931995:1932294 | 1932145 | i  |
| <a href="#">XC_2749</a>                    | oxoglutarate dehydrogenase                    | + | 167 | 3301159:3301458 | 3301309 | i  |
| <a href="#">XC_2766</a>                    | recombination protein N                       | + | 159 | 3322931:3323230 | 3323081 | u  |
| <a href="#">XC_3282</a>                    | amidophosphoribosyltransferase                | - | 185 | 3930802:3931101 | 3930952 | ui |
| <a href="#">XC_3442</a>                    | diadenosine tetraphosphatase                  | + | 190 | 4092368:4092667 | 4092518 | i  |
| <a href="#">XC_RS21975</a>                 | RNase_P_RNA                                   | - | 177 | 4182381:4182680 | 4182531 | ui |
| <a href="#">XC_3578</a>                    | phosphoribosylformylglycinamide synthetase    | - | 182 | 4254785:4255084 | 4254935 | i  |
| <a href="#">XC_3596</a>                    | prolyl-tRNA synthetase                        | + | 162 | 4274914:4275213 | 4275064 | ui |
| <a href="#">XC_3945</a>                    | arginyl-tRNA synthetase                       | + | 176 | 4657601:4657900 | 4657751 | ui |
| <b>09. Small Molecules Metabolism</b>      |                                               |   |     |                 |         |    |
| <a href="#">XC_0529</a>                    | biotin carboxyl carrier protein of acetyl-CoA | - | 176 | 625922:626221   | 626072  | u  |
| <a href="#">XC_0712</a>                    | lipoate biosynthesis protein B                | + | 179 | 854823:855122   | 854973  | ui |
| <a href="#">XC_2653</a>                    | imidazolonepropionase                         | + | 187 | 3192289:3192588 | 3192439 | ui |
| <a href="#">XC_2654</a>                    | atrazine chlorohydrolase                      | - | 187 | 3192289:3192588 | 3192439 | ui |
| <a href="#">XC_3229</a>                    | beta-ketoacyl-[ACP] synthase III              | - | 231 | 3875838:3876137 | 3875988 | u  |
| <a href="#">XC_3433</a>                    | 2-octaprenyl-6-methoxyphenol hydroxylase      | - | 169 | 4083075:4083374 | 4083225 | ui |
| <a href="#">XC_3439</a>                    | pyridoxal phosphate biosynthetic protein      | + | 167 | 4089669:4089968 | 4089819 | i  |
| <a href="#">XC_3642</a>                    | fumarylacetoacetate hydrolase                 | - | 182 | 4325445:4325744 | 4325595 | u  |
| <b>10. Protein Maintenance and Folding</b> |                                               |   |     |                 |         |    |
| <a href="#">XC_0535</a>                    | 60 kDa chaperonin                             | + | 164 | 633603:633902   | 633753  | i  |
| <a href="#">XC_2931</a>                    | heat-shock protein Hsp70                      | + | 294 | 3516859:3517158 | 3517009 | u  |

| <b>11. Degradative Enzymes</b>                      |                                        |   |     |                 |         |    |
|-----------------------------------------------------|----------------------------------------|---|-----|-----------------|---------|----|
| XC_2772                                             | serine peptidase                       | - | 191 | 3330847:3331146 | 3330997 | u  |
| XC_3196                                             | integral membrane protease subunit     | - | 175 | 3830927:3831226 | 3831077 | ui |
| XC_3379                                             | extracellular protease                 | - | 184 | 4029346:4029645 | 4029496 | i  |
| XC_3585                                             | aminopeptidase A/I                     | + | 189 | 4261880:4262179 | 4262030 | ui |
| XC_3832                                             | protease IV                            | - | 170 | 4528695:4528994 | 4528845 | i  |
| XC_3888                                             | O-sialoglycoprotein endopeptidase      | - | 210 | 4593876:4594175 | 4594026 | u  |
| <b>12. Regulatory Function</b>                      |                                        |   |     |                 |         |    |
| XC_0830                                             | transcriptional regulator              | - | 180 | 997816:998115   | 997966  | ui |
| XC_1309                                             | nitrogen regulatory IIA protein        | - | 185 | 1600188:1600487 | 1600338 | ui |
| XC_2253                                             | transcriptional regulator              | + | 223 | 2711165:2711464 | 2711315 | u  |
| XC_3966                                             | transcriptional regulator tetR family  | + | 197 | 4683393:4683692 | 4683543 | ui |
| <b>13. Pathogenicity, Virulence, and Adaptation</b> |                                        |   |     |                 |         |    |
| XC_2227                                             | HrpX related protein                   | + | 343 | 2687926:2688225 | 2688076 | i  |
| XC_3608                                             | phosphoglucomutase; phosphomannomutase | + | 187 | 4289011:4289310 | 4289161 | ui |
| XC_4223                                             | OmpA-related protein                   | + | 197 | 4992565:4992864 | 4992715 | u  |
| XC_4296                                             | toluene tolerance protein              | + | 244 | 5097673:5097972 | 5097823 | ui |
| <b>14. Mobile Genetic Elements</b>                  |                                        |   |     |                 |         |    |
| XC_2777                                             | phage-related protein                  | - | 400 | 3334294:3334593 | 3334444 | d  |
| <b>15. Oxidation-Reduction Process</b>              |                                        |   |     |                 |         |    |
| XC_3301                                             | oxidoreductase                         | + | 236 | 3952162:3952461 | 3952312 | u  |
| <b>16. Hypothetical Protein</b>                     |                                        |   |     |                 |         |    |
| XC_0831                                             | conserved hypothetical protein         | + | 180 | 997816:998115   | 997966  | ui |

|                         |                                |   |     |                 |         |    |
|-------------------------|--------------------------------|---|-----|-----------------|---------|----|
| <a href="#">XC_1011</a> | conserved hypothetical protein | - | 335 | 1223681:1223980 | 1223831 | ui |
| <a href="#">XC_1012</a> | conserved hypothetical protein | + | 335 | 1223681:1223980 | 1223831 | u  |
| <a href="#">XC_1068</a> | conserved hypothetical protein | - | 173 | 1286056:1286355 | 1286206 | ui |
| <a href="#">XC_1143</a> | conserved hypothetical protein | + | 199 | 1384855:1385154 | 1385005 | u  |
| <a href="#">XC_1242</a> | conserved hypothetical protein | - | 244 | 1522241:1522540 | 1522391 | u  |
| <a href="#">XC_1306</a> | conserved hypothetical protein | - | 184 | 1597264:1597563 | 1597414 | u  |
| <a href="#">XC_1534</a> | conserved hypothetical protein | - | 378 | 1843392:1843691 | 1843542 | ui |
| <a href="#">XC_2810</a> | conserved hypothetical protein | - | 188 | 3383673:3383972 | 3383823 | ui |
| <a href="#">XC_2811</a> | conserved hypothetical protein | + | 188 | 3383673:3383972 | 3383823 | u  |
| <a href="#">XC_3238</a> | conserved hypothetical protein | + | 187 | 3882600:3882899 | 3882750 | u  |
| <a href="#">XC_3257</a> | conserved hypothetical protein | - | 195 | 3899681:3899980 | 3899831 | u  |
| <a href="#">XC_3434</a> | conserved hypothetical protein | + | 169 | 4083075:4083374 | 4083225 | u  |
| <a href="#">XC_3503</a> | conserved hypothetical protein | + | 389 | 4162407:4162706 | 4162557 | d  |
| <a href="#">XC_3540</a> | conserved hypothetical protein | + | 207 | 4203436:4203735 | 4203586 | ui |
| <a href="#">XC_3556</a> | conserved hypothetical protein | - | 277 | 4222468:4222767 | 4222618 | ui |
| <a href="#">XC_3584</a> | conserved hypothetical protein | - | 189 | 4261880:4262179 | 4262030 | u  |
| <a href="#">XC_3637</a> | UptF protein                   | - | 195 | 4320457:4320756 | 4320607 | u  |
| <a href="#">XC_3820</a> | conserved hypothetical protein | + | 195 | 4515189:4515488 | 4515339 | u  |
| <a href="#">XC_3822</a> | Smg protein                    | + | 199 | 4517649:4517948 | 4517799 | ui |
| <a href="#">XC_3956</a> | conserved hypothetical protein | + | 220 | 4674355:4674654 | 4674505 | ui |
| <a href="#">XC_4295</a> | conserved hypothetical protein | - | 244 | 5097673:5097972 | 5097823 | u  |
| <a href="#">XC_4311</a> | conserved hypothetical protein | - | 187 | 5117949:5118248 | 5118099 | u  |

a. Promoters identified by the ChIP-seq when bacterium was treated with osmstress. Genes in blue indicate that its 5' upstream regions were identified in both strains WT-vgrR-his<sub>6</sub> and Δpre-vgrR-his<sub>6</sub>.

## Supplementary References

1. Wang, L. et al. Two-component signaling system VgrRS directly senses extracytoplasmic and intracellular iron to control bacterial adaptation under iron depleted stress. *PLoS Pathog.* **12** (2016).
