# Supplementary material for: Proteolysis of histidine kinase VgrS inhibits its autophosphorylation and promotes osmostress resistance in Xanthomonas campestris
Source: PubMed Central journal article supplement (PMC6237974; doi:10.1038/s41467-018-07228-4), 2018-11-15
Supplement: 41467_2018_7228_MOESM3_ESM.pdf [file 41467_2018_7228_MOESM3_ESM.pdf]

## Reporting Summary

Nature Research wishes to improve the reproducibility of the work that we publish. This form provides structure for consistency and transparency in reporting. For further information on Nature Research policies, see [Authors & Referees](#) and the [Editorial Policy Checklist](#).

### Statistical parameters

When statistical analyses are reported, confirm that the following items are present in the relevant location (e.g. figure legend, table legend, main text, or Methods section).

n/a Confirmed

- The exact sample size ( $n$ ) for each experimental group/condition, given as a discrete number and unit of measurement
- An indication of whether measurements were taken from distinct samples or whether the same sample was measured repeatedly
- The statistical test(s) used AND whether they are one- or two-sided  
*Only common tests should be described solely by name; describe more complex techniques in the Methods section.*
- A description of all covariates tested
- A description of any assumptions or corrections, such as tests of normality and adjustment for multiple comparisons
- A full description of the statistics including central tendency (e.g. means) or other basic estimates (e.g. regression coefficient) AND variation (e.g. standard deviation) or associated estimates of uncertainty (e.g. confidence intervals)
- For null hypothesis testing, the test statistic (e.g.  $F$ ,  $t$ ,  $r$ ) with confidence intervals, effect sizes, degrees of freedom and  $P$  value noted  
*Give  $P$  values as exact values whenever suitable.*
- For Bayesian analysis, information on the choice of priors and Markov chain Monte Carlo settings
- For hierarchical and complex designs, identification of the appropriate level for tests and full reporting of outcomes
- Estimates of effect sizes (e.g. Cohen's  $d$ , Pearson's  $r$ ), indicating how they were calculated
- Clearly defined error bars  
*State explicitly what error bars represent (e.g. SD, SE, CI)*

*Our web collection on [statistics for biologists](#) may be useful.*

### Software and code

Policy information about [availability of computer code](#)

Data collection

Data analysis

For manuscripts utilizing custom algorithms or software that are central to the research but not yet described in published literature, software must be made available to editors/reviewers upon request. We strongly encourage code deposition in a community repository (e.g. GitHub). See the Nature Research [guidelines for submitting code & software](#) for further information.

### Data

Policy information about [availability of data](#)

All manuscripts must include a [data availability statement](#). This statement should provide the following information, where applicable:

- Accession codes, unique identifiers, or web links for publicly available datasets
- A list of figures that have associated raw data
- A description of any restrictions on data availability

All relevant data in this work has been included in the manuscript. The original, uncropped images were shown in Supplementary Fig. 10. Data and experimental materials are available from the corresponding author upon reasonable request. The accession number for the ChIP-seq dataset reported in this study is GenBank GEO: GSE120292 [<https://www.ncbi.nlm.nih.gov/geo/query/acc.cgi?acc=GSE120292>].

## Field-specific reporting

Please select the best fit for your research. If you are not sure, read the appropriate sections before making your selection.

Life sciences  Behavioural & social sciences  Ecological, evolutionary & environmental sciences

For a reference copy of the document with all sections, see [nature.com/authors/policies/ReportingSummary-flat.pdf](https://www.nature.com/authors/policies/ReportingSummary-flat.pdf)

## Life sciences study design

All studies must disclose on these points even when the disclosure is negative.

|                 |                                                                                                                              |
|-----------------|------------------------------------------------------------------------------------------------------------------------------|
| Sample size     | The sample size of all the experiments are beyond three samples or more. the number of n is indicated in the figure legends. |
| Data exclusions | No data was excluded in the analysis.                                                                                        |
| Replication     | All experiments were repeated three or two times.                                                                            |
| Randomization   | The experiment design and data collection are randomized.                                                                    |
| Blinding        | Investigators are blinding to the experimental results                                                                       |

## Reporting for specific materials, systems and methods

### Materials & experimental systems

| n/a                                 | Involvement in the study                             |
|-------------------------------------|------------------------------------------------------|
| <input checked="" type="checkbox"/> | <input type="checkbox"/> Unique biological materials |
| <input type="checkbox"/>            | <input checked="" type="checkbox"/> Antibodies       |
| <input checked="" type="checkbox"/> | <input type="checkbox"/> Eukaryotic cell lines       |
| <input checked="" type="checkbox"/> | <input type="checkbox"/> Palaeontology               |
| <input checked="" type="checkbox"/> | <input type="checkbox"/> Animals and other organisms |
| <input checked="" type="checkbox"/> | <input type="checkbox"/> Human research participants |

### Methods

| n/a                                 | Involvement in the study                        |
|-------------------------------------|-------------------------------------------------|
| <input type="checkbox"/>            | <input checked="" type="checkbox"/> ChIP-seq    |
| <input checked="" type="checkbox"/> | <input type="checkbox"/> Flow cytometry         |
| <input checked="" type="checkbox"/> | <input type="checkbox"/> MRI-based neuroimaging |

## Antibodies

|                 |                                                                                                                                                   |
|-----------------|---------------------------------------------------------------------------------------------------------------------------------------------------|
| Antibodies used | We used polyclonal antiserum of VgrS, Prc, HPPK and monoclonal antibodies for HA (M20003-L, Abmart, China) and His6 tags (M20001L, Abmart, China) |
| Validation      | Yes, these antibodies were verified by Western blotting using purified proteins.                                                                  |

## ChIP-seq

### Data deposition

- Confirm that both raw and final processed data have been deposited in a public database such as [GEO](https://www.ncbi.nlm.nih.gov/geo/).
- Confirm that you have deposited or provided access to graph files (e.g. BED files) for the called peaks.

|                                                                               |                                                                                                                                                     |
|-------------------------------------------------------------------------------|-----------------------------------------------------------------------------------------------------------------------------------------------------|
| Data access links<br><i>May remain private before publication.</i>            | <a href="https://www.ncbi.nlm.nih.gov/geo/query/acc.cgi?acc=GSE120292">https://www.ncbi.nlm.nih.gov/geo/query/acc.cgi?acc=GSE120292</a>             |
| Files in database submission                                                  | GSE120292_RAW.tar, GSM3397750_WT_CvgrR-his_treat_afterfitting_NC_007086.1.wig.gz, GSM3397751_DLTPrC_CvgrR-his_treat_afterfitting_NC_007086.1.wig.gz |
| Genome browser session<br>(e.g. <a href="https://genome.ucsc.edu/">UCSC</a> ) | No longer applicable                                                                                                                                |

### Methodology

|            |                                                                                                                |
|------------|----------------------------------------------------------------------------------------------------------------|
| Replicates | The experimental replicates are 3, the sample of the three replicates was mixed for high-throughput sequencing |
|------------|----------------------------------------------------------------------------------------------------------------|

Sequencing depth

Sequencing depth is 1G, the total number of reads is 6275823, length of reads is 101bp and they were paired-end

Antibodies

anti-His6 antibody (Abmart, #M20001, lot: 294073)

Peak calling parameters

Peak calling was conducted by MACS2

Data quality

The high-throughput sequencing reads were analysed using the Burrows–Wheeler Aligner method

Software

The consensus binding motif analysis was completed with MEME and FIMI tools in the MEME software suite
